# Supplementary material for: Coffee Microbiota and Its Potential Use in Sustainable Crop Management. A Review
Source: Frontiers journal article supplement (doi:10.3389/fsufs.2020.607935), 2020-12-03
Supplement: Table_3.XLSX [file Table_3.XLSX]

## Sheet: Toxigenic Fungi
Toxigenic fungi producing Ochratoxin A (OTA), Ochratoxin B (OTB) and Aflatoxin B (AFB) in association with coffee
Type of colonization	Toxins Porduced	Phylum	Order	Genus	species	Genus species	Citation N°
Post Harvest	OTA	Ascomycota	Eurotiales	Aspergillus	auricomus	Aspergillus auricomus	22
Post Harvest	OTA	Ascomycota	Eurotiales	Aspergillus	auricomus	Aspergillus auricomus	23
Post Harvest	OTA	Ascomycota	Eurotiales	Aspergillus	auricomus	Aspergillus auricomus	24
Post Harvest	OTA	Ascomycota	Eurotiales	Aspergillus	auricomus	Aspergillus auricomus	74
Post Harvest	OTA	Ascomycota	Eurotiales	Aspergillus	auricomus	Aspergillus auricomus	166
Post Harvest	OTA	Ascomycota	Eurotiales	Aspergillus	carbonarius	Aspergillus carbonarius	7
Post Harvest	OTA	Ascomycota	Eurotiales	Aspergillus	carbonarius	Aspergillus carbonarius	40
Post Harvest	OTA	Ascomycota	Eurotiales	Aspergillus	carbonarius	Aspergillus carbonarius	51
Post Harvest	OTA	Ascomycota	Eurotiales	Aspergillus	carbonarius	Aspergillus carbonarius	66
Post Harvest	OTA	Ascomycota	Eurotiales	Aspergillus	carbonarius	Aspergillus carbonarius	87
Post Harvest	OTA	Ascomycota	Eurotiales	Aspergillus	carbonarius	Aspergillus carbonarius	91
Post Harvest	OTA	Ascomycota	Eurotiales	Aspergillus	carbonarius	Aspergillus carbonarius	93
Post Harvest	OTA	Ascomycota	Eurotiales	Aspergillus	carbonarius	Aspergillus carbonarius	94
Post Harvest	OTA	Ascomycota	Eurotiales	Aspergillus	carbonarius	Aspergillus carbonarius	99
Post Harvest	OTA	Ascomycota	Eurotiales	Aspergillus	carbonarius	Aspergillus carbonarius	99
Post Harvest	OTA	Ascomycota	Eurotiales	Aspergillus	carbonarius	Aspergillus carbonarius	103
Post Harvest	OTA	Ascomycota	Eurotiales	Aspergillus	carbonarius	Aspergillus carbonarius	136
Post Harvest	OTA	Ascomycota	Eurotiales	Aspergillus	carbonarius	Aspergillus carbonarius	136
Post Harvest	OTA	Ascomycota	Eurotiales	Aspergillus	carbonarius	Aspergillus carbonarius	137
Post Harvest	OTA	Ascomycota	Eurotiales	Aspergillus	carbonarius	Aspergillus carbonarius	137
Post Harvest	OTA	Ascomycota	Eurotiales	Aspergillus	carbonarius	Aspergillus carbonarius	146
Post Harvest	OTA	Ascomycota	Eurotiales	Aspergillus	carbonarius	Aspergillus carbonarius	146
Post Harvest	OTA	Ascomycota	Eurotiales	Aspergillus	carbonarius	Aspergillus carbonarius	172
Post Harvest	OTA	Ascomycota	Eurotiales	Aspergillus	carbonarius	Aspergillus carbonarius	194
Post Harvest	OTA	Ascomycota	Eurotiales	Aspergillus	dimorphicus	Aspergillus dimorphicus	22
Post Harvest	OTA	Ascomycota	Eurotiales	Aspergillus	dimorphicus	Aspergillus dimorphicus	24
Post Harvest	OTA	Ascomycota	Eurotiales	Aspergillus	dimorphicus	Aspergillus dimorphicus	167
Post Harvest	OTA	Ascomycota	Eurotiales	Aspergillus	dimorphicus	Aspergillus dimorphicus	181
Post Harvest	OTA	Ascomycota	Eurotiales	Aspergillus	dimorphicus	Aspergillus dimorphicus	182
Post Harvest	OTA	Ascomycota	Eurotiales	Aspergillus	elegans	Aspergillus elegans	23
Post Harvest	AFB	Ascomycota	Eurotiales	Aspergillus	flavus	Aspergillus flavus	1
Post Harvest	AFB	Ascomycota	Eurotiales	Aspergillus	flavus	Aspergillus flavus	6
Post Harvest	AFB	Ascomycota	Eurotiales	Aspergillus	flavus	Aspergillus flavus	7
Post Harvest	AFB	Ascomycota	Eurotiales	Aspergillus	flavus	Aspergillus flavus	21
Post Harvest	AFB	Ascomycota	Eurotiales	Aspergillus	flavus	Aspergillus flavus	22
Post Harvest	AFB	Ascomycota	Eurotiales	Aspergillus	flavus	Aspergillus flavus	23
Epiphytic	AFB	Ascomycota	Eurotiales	Aspergillus	flavus	Aspergillus flavus	51
Post Harvest	AFB	Ascomycota	Eurotiales	Aspergillus	flavus	Aspergillus flavus	51
Post Harvest	AFB	Ascomycota	Eurotiales	Aspergillus	flavus	Aspergillus flavus	74
Post Harvest	AFB	Ascomycota	Eurotiales	Aspergillus	flavus	Aspergillus flavus	79
Post Harvest	AFB	Ascomycota	Eurotiales	Aspergillus	flavus	Aspergillus flavus	79
Post Harvest	AFB	Ascomycota	Eurotiales	Aspergillus	flavus	Aspergillus flavus	93
Post Harvest	AFB	Ascomycota	Eurotiales	Aspergillus	flavus	Aspergillus flavus	94
Post Harvest	AFB	Ascomycota	Eurotiales	Aspergillus	flavus	Aspergillus flavus	103
Post Harvest	AFB	Ascomycota	Eurotiales	Aspergillus	flavus	Aspergillus flavus	107
Post Harvest	AFB	Ascomycota	Eurotiales	Aspergillus	flavus	Aspergillus flavus	118
Post Harvest	AFB	Ascomycota	Eurotiales	Aspergillus	flavus	Aspergillus flavus	118
Post Harvest	AFB	Ascomycota	Eurotiales	Aspergillus	flavus	Aspergillus flavus	118
Post Harvest	AFB	Ascomycota	Eurotiales	Aspergillus	flavus	Aspergillus flavus	118
Post Harvest	AFB	Ascomycota	Eurotiales	Aspergillus	flavus	Aspergillus flavus	118
Post Harvest	AFB	Ascomycota	Eurotiales	Aspergillus	flavus	Aspergillus flavus	118
Post Harvest	AFB	Ascomycota	Eurotiales	Aspergillus	flavus	Aspergillus flavus	118
Post Harvest	AFB	Ascomycota	Eurotiales	Aspergillus	flavus	Aspergillus flavus	118
Post Harvest	AFB	Ascomycota	Eurotiales	Aspergillus	flavus	Aspergillus flavus	118
Post Harvest	AFB	Ascomycota	Eurotiales	Aspergillus	flavus	Aspergillus flavus	118
Post Harvest	AFB	Ascomycota	Eurotiales	Aspergillus	flavus	Aspergillus flavus	118
Post Harvest	AFB	Ascomycota	Eurotiales	Aspergillus	flavus	Aspergillus flavus	118
Post Harvest	AFB	Ascomycota	Eurotiales	Aspergillus	flavus	Aspergillus flavus	118
Post Harvest	AFB	Ascomycota	Eurotiales	Aspergillus	flavus	Aspergillus flavus	118
Post Harvest	AFB	Ascomycota	Eurotiales	Aspergillus	flavus	Aspergillus flavus	118
Post Harvest	AFB	Ascomycota	Eurotiales	Aspergillus	flavus	Aspergillus flavus	118
Post Harvest	AFB	Ascomycota	Eurotiales	Aspergillus	flavus	Aspergillus flavus	118
Post Harvest	AFB	Ascomycota	Eurotiales	Aspergillus	flavus	Aspergillus flavus	118
Post Harvest	AFB	Ascomycota	Eurotiales	Aspergillus	flavus	Aspergillus flavus	118
Post Harvest	AFB	Ascomycota	Eurotiales	Aspergillus	flavus	Aspergillus flavus	118
Post Harvest	AFB	Ascomycota	Eurotiales	Aspergillus	flavus	Aspergillus flavus	118
Post Harvest	AFB	Ascomycota	Eurotiales	Aspergillus	flavus	Aspergillus flavus	118
Post Harvest	AFB	Ascomycota	Eurotiales	Aspergillus	flavus	Aspergillus flavus	118
Post Harvest	AFB	Ascomycota	Eurotiales	Aspergillus	flavus	Aspergillus flavus	118
Post Harvest	AFB	Ascomycota	Eurotiales	Aspergillus	flavus	Aspergillus flavus	118
Post Harvest	AFB	Ascomycota	Eurotiales	Aspergillus	flavus	Aspergillus flavus	118
Post Harvest	AFB	Ascomycota	Eurotiales	Aspergillus	flavus	Aspergillus flavus	118
Post Harvest	AFB	Ascomycota	Eurotiales	Aspergillus	flavus	Aspergillus flavus	118
Post Harvest	AFB	Ascomycota	Eurotiales	Aspergillus	flavus	Aspergillus flavus	118
Post Harvest	AFB	Ascomycota	Eurotiales	Aspergillus	flavus	Aspergillus flavus	118
Post Harvest	AFB	Ascomycota	Eurotiales	Aspergillus	flavus	Aspergillus flavus	132
Post Harvest	AFB	Ascomycota	Eurotiales	Aspergillus	flavus	Aspergillus flavus	132
Post Harvest	AFB	Ascomycota	Eurotiales	Aspergillus	flavus	Aspergillus flavus	132
Post Harvest	AFB	Ascomycota	Eurotiales	Aspergillus	flavus	Aspergillus flavus	132
Post Harvest	AFB	Ascomycota	Eurotiales	Aspergillus	flavus	Aspergillus flavus	132
Post Harvest	AFB	Ascomycota	Eurotiales	Aspergillus	flavus	Aspergillus flavus	132
Post Harvest	AFB	Ascomycota	Eurotiales	Aspergillus	flavus	Aspergillus flavus	132
Post Harvest	AFB	Ascomycota	Eurotiales	Aspergillus	flavus	Aspergillus flavus	132
Post Harvest	AFB	Ascomycota	Eurotiales	Aspergillus	flavus	Aspergillus flavus	136
Post Harvest	AFB	Ascomycota	Eurotiales	Aspergillus	flavus	Aspergillus flavus	136
Post Harvest	AFB	Ascomycota	Eurotiales	Aspergillus	flavus	Aspergillus flavus	167
Post Harvest	AFB	Ascomycota	Eurotiales	Aspergillus	flavus	Aspergillus flavus	181
Post Harvest	AFB	Ascomycota	Eurotiales	Aspergillus	flavus	Aspergillus flavus	182
Post Harvest	AFB	Ascomycota	Eurotiales	Aspergillus	flavus	Aspergillus flavus	197
Post Harvest	AFB	Ascomycota	Eurotiales	Aspergillus	flavus	Aspergillus flavus	218
Post Harvest	AFB	Ascomycota	Eurotiales	Aspergillus	flavus	Aspergillus flavus	218
Post Harvest	OTA	Ascomycota	Eurotiales	Aspergillus	insulicola	Aspergillus insulicola	23
Post Harvest	OTA	Ascomycota	Eurotiales	Aspergillus	japonicus	Aspergillus japonicus	6
Post Harvest	OTA	Ascomycota	Eurotiales	Aspergillus	japonicus	Aspergillus japonicus	7
Post Harvest	OTA	Ascomycota	Eurotiales	Aspergillus	japonicus	Aspergillus japonicus	93
Post Harvest	OTA	Ascomycota	Eurotiales	Aspergillus	japonicus	Aspergillus japonicus	94
Post Harvest	OTA	Ascomycota	Eurotiales	Aspergillus	melleus	Aspergillus melleus	21
Post Harvest	OTA	Ascomycota	Eurotiales	Aspergillus	melleus	Aspergillus melleus	22
Post Harvest	OTA	Ascomycota	Eurotiales	Aspergillus	melleus	Aspergillus melleus	23
Post Harvest	OTA	Ascomycota	Eurotiales	Aspergillus	melleus	Aspergillus melleus	24
Post Harvest	OTA	Ascomycota	Eurotiales	Aspergillus	melleus	Aspergillus melleus	79
Post Harvest	OTA	Ascomycota	Eurotiales	Aspergillus	melleus	Aspergillus melleus	216
Post Harvest	OTA	Ascomycota	Eurotiales	Aspergillus	melleus	Aspergillus melleus	216
Post Harvest	OTA and OTB	Ascomycota	Eurotiales	Aspergillus	niger	Aspergillus niger	1
Post Harvest	OTA and OTB	Ascomycota	Eurotiales	Aspergillus	niger	Aspergillus niger	3
Post Harvest	OTA and OTB	Ascomycota	Eurotiales	Aspergillus	niger	Aspergillus niger	6
Post Harvest	OTA and OTB	Ascomycota	Eurotiales	Aspergillus	niger	Aspergillus niger	7
Post Harvest	OTA and OTB	Ascomycota	Eurotiales	Aspergillus	niger	Aspergillus niger	8
Post Harvest	OTA and OTB	Ascomycota	Eurotiales	Aspergillus	niger	Aspergillus niger	9
Post Harvest	OTA and OTB	Ascomycota	Eurotiales	Aspergillus	niger	Aspergillus niger	21
Post Harvest	OTA and OTB	Ascomycota	Eurotiales	Aspergillus	niger	Aspergillus niger	22
Post Harvest	OTA and OTB	Ascomycota	Eurotiales	Aspergillus	niger	Aspergillus niger	23
Post Harvest	OTA and OTB	Ascomycota	Eurotiales	Aspergillus	niger	Aspergillus niger	24
Post Harvest	OTA and OTB	Ascomycota	Eurotiales	Aspergillus	niger	Aspergillus niger	28
Post Harvest	OTA and OTB	Ascomycota	Eurotiales	Aspergillus	niger	Aspergillus niger	35
Post Harvest	OTA and OTB	Ascomycota	Eurotiales	Aspergillus	niger	Aspergillus niger	36
Post Harvest	OTA and OTB	Ascomycota	Eurotiales	Aspergillus	niger	Aspergillus niger	40
Epiphytic	OTA and OTB	Ascomycota	Eurotiales	Aspergillus	niger	Aspergillus niger	51
Post Harvest	OTA and OTB	Ascomycota	Eurotiales	Aspergillus	niger	Aspergillus niger	51
Post Harvest	OTA and OTB	Ascomycota	Eurotiales	Aspergillus	niger	Aspergillus niger	54
Post Harvest	OTA and OTB	Ascomycota	Eurotiales	Aspergillus	niger	Aspergillus niger	74
Post Harvest	OTA and OTB	Ascomycota	Eurotiales	Aspergillus	niger	Aspergillus niger	79
Post Harvest	OTA and OTB	Ascomycota	Eurotiales	Aspergillus	niger	Aspergillus niger	79
Post Harvest	OTA and OTB	Ascomycota	Eurotiales	Aspergillus	niger	Aspergillus niger	83
Rhizospheric	OTA and OTB	Ascomycota	Eurotiales	Aspergillus	niger	Aspergillus niger	84
Post Harvest	OTA and OTB	Ascomycota	Eurotiales	Aspergillus	niger	Aspergillus niger	88
Epiphytic	OTA and OTB	Ascomycota	Eurotiales	Aspergillus	niger	Aspergillus niger	89
Epiphytic	OTA and OTB	Ascomycota	Eurotiales	Aspergillus	niger	Aspergillus niger	89
Post Harvest	OTA and OTB	Ascomycota	Eurotiales	Aspergillus	niger	Aspergillus niger	93
Post Harvest	OTA and OTB	Ascomycota	Eurotiales	Aspergillus	niger	Aspergillus niger	94
Post Harvest	OTA and OTB	Ascomycota	Eurotiales	Aspergillus	niger	Aspergillus niger	99
Post Harvest	OTA and OTB	Ascomycota	Eurotiales	Aspergillus	niger	Aspergillus niger	99
Post Harvest	OTA and OTB	Ascomycota	Eurotiales	Aspergillus	niger	Aspergillus niger	100
Post Harvest	OTA and OTB	Ascomycota	Eurotiales	Aspergillus	niger	Aspergillus niger	103
Post Harvest	OTA and OTB	Ascomycota	Eurotiales	Aspergillus	niger	Aspergillus niger	107
Post Harvest	OTA and OTB	Ascomycota	Eurotiales	Aspergillus	niger	Aspergillus niger	118
Post Harvest	OTA and OTB	Ascomycota	Eurotiales	Aspergillus	niger	Aspergillus niger	136
Post Harvest	OTA and OTB	Ascomycota	Eurotiales	Aspergillus	niger	Aspergillus niger	136
Post Harvest	OTA and OTB	Ascomycota	Eurotiales	Aspergillus	niger	Aspergillus niger	137
Post Harvest	OTA and OTB	Ascomycota	Eurotiales	Aspergillus	niger	Aspergillus niger	137
Post Harvest	OTA and OTB	Ascomycota	Eurotiales	Aspergillus	niger	Aspergillus niger	137
Post Harvest	OTA and OTB	Ascomycota	Eurotiales	Aspergillus	niger	Aspergillus niger	137
Post Harvest	OTA and OTB	Ascomycota	Eurotiales	Aspergillus	niger	Aspergillus niger	148
Post Harvest	OTA and OTB	Ascomycota	Eurotiales	Aspergillus	niger	Aspergillus niger	149
Post Harvest	OTA and OTB	Ascomycota	Eurotiales	Aspergillus	niger	Aspergillus niger	154
Post Harvest	OTA and OTB	Ascomycota	Eurotiales	Aspergillus	niger	Aspergillus niger	166
Post Harvest	OTA and OTB	Ascomycota	Eurotiales	Aspergillus	niger	Aspergillus niger	167
Post Harvest	OTA and OTB	Ascomycota	Eurotiales	Aspergillus	niger	Aspergillus niger	169
Post Harvest	OTA and OTB	Ascomycota	Eurotiales	Aspergillus	niger	Aspergillus niger	170
Post Harvest	OTA and OTB	Ascomycota	Eurotiales	Aspergillus	niger	Aspergillus niger	172
Post Harvest	OTA and OTB	Ascomycota	Eurotiales	Aspergillus	niger	Aspergillus niger	181
Post Harvest	OTA and OTB	Ascomycota	Eurotiales	Aspergillus	niger	Aspergillus niger	182
Post Harvest	OTA and OTB	Ascomycota	Eurotiales	Aspergillus	niger	Aspergillus niger	183
Post Harvest	OTA and OTB	Ascomycota	Eurotiales	Aspergillus	niger	Aspergillus niger	191
Post Harvest	OTA and OTB	Ascomycota	Eurotiales	Aspergillus	niger	Aspergillus niger	192
Post Harvest	OTA and OTB	Ascomycota	Eurotiales	Aspergillus	niger	Aspergillus niger	194
Post Harvest	OTA and OTB	Ascomycota	Eurotiales	Aspergillus	niger	Aspergillus niger	195
Post Harvest	OTA and OTB	Ascomycota	Eurotiales	Aspergillus	niger	Aspergillus niger	197
Post Harvest	OTA and OTB	Ascomycota	Eurotiales	Aspergillus	niger	Aspergillus niger	197
Post Harvest	OTA and OTB	Ascomycota	Eurotiales	Aspergillus	niger	Aspergillus niger	202
Post Harvest	OTA and OTB	Ascomycota	Eurotiales	Aspergillus	niger	Aspergillus niger	208
Post Harvest	OTA and OTB	Ascomycota	Eurotiales	Aspergillus	niger	Aspergillus niger	208
Endophytic	OTA and OTB	Ascomycota	Eurotiales	Aspergillus	niger	Aspergillus niger	211
Post Harvest	OTA and OTB	Ascomycota	Eurotiales	Aspergillus	niger	Aspergillus niger	213
Post Harvest	OTA and OTB	Ascomycota	Eurotiales	Aspergillus	niger	Aspergillus niger	215
Post Harvest	OTA and OTB	Ascomycota	Eurotiales	Aspergillus	niger	Aspergillus niger	215
Post Harvest	OTA and OTB	Ascomycota	Eurotiales	Aspergillus	niger	Aspergillus niger	216
Post Harvest	OTA and OTB	Ascomycota	Eurotiales	Aspergillus	niger	Aspergillus niger	216
Post Harvest	OTA and OTB	Ascomycota	Eurotiales	Aspergillus	niger	Aspergillus niger	219
Post Harvest	OTA	Ascomycota	Eurotiales	Aspergillus	ochraceus	Aspergillus ochraceus	3
Post Harvest	OTA	Ascomycota	Eurotiales	Aspergillus	ochraceus	Aspergillus ochraceus	6
Post Harvest	OTA	Ascomycota	Eurotiales	Aspergillus	ochraceus	Aspergillus ochraceus	7
Post Harvest	OTA	Ascomycota	Eurotiales	Aspergillus	ochraceus	Aspergillus ochraceus	21
Post Harvest	OTA	Ascomycota	Eurotiales	Aspergillus	ochraceus	Aspergillus ochraceus	22
Post Harvest	OTA	Ascomycota	Eurotiales	Aspergillus	ochraceus	Aspergillus ochraceus	23
Post Harvest	OTA	Ascomycota	Eurotiales	Aspergillus	ochraceus	Aspergillus ochraceus	24
Post Harvest	OTA	Ascomycota	Eurotiales	Aspergillus	ochraceus	Aspergillus ochraceus	40
Epiphytic	OTA	Ascomycota	Eurotiales	Aspergillus	ochraceus	Aspergillus ochraceus	51
Post Harvest	OTA	Ascomycota	Eurotiales	Aspergillus	ochraceus	Aspergillus ochraceus	51
Post Harvest	OTA	Ascomycota	Eurotiales	Aspergillus	ochraceus	Aspergillus ochraceus	74
Post Harvest	OTA	Ascomycota	Eurotiales	Aspergillus	ochraceus	Aspergillus ochraceus	79
Post Harvest	OTA	Ascomycota	Eurotiales	Aspergillus	ochraceus	Aspergillus ochraceus	79
Post Harvest	OTA	Ascomycota	Eurotiales	Aspergillus	ochraceus	Aspergillus ochraceus	91
Post Harvest	OTA	Ascomycota	Eurotiales	Aspergillus	ochraceus	Aspergillus ochraceus	91
Post Harvest	OTA	Ascomycota	Eurotiales	Aspergillus	ochraceus	Aspergillus ochraceus	93
Post Harvest	OTA	Ascomycota	Eurotiales	Aspergillus	ochraceus	Aspergillus ochraceus	94
Post Harvest	OTA	Ascomycota	Eurotiales	Aspergillus	ochraceus	Aspergillus ochraceus	99
Post Harvest	OTA	Ascomycota	Eurotiales	Aspergillus	ochraceus	Aspergillus ochraceus	99
Post Harvest	OTA	Ascomycota	Eurotiales	Aspergillus	ochraceus	Aspergillus ochraceus	103
Post Harvest	OTA	Ascomycota	Eurotiales	Aspergillus	ochraceus	Aspergillus ochraceus	107
Post Harvest	OTA	Ascomycota	Eurotiales	Aspergillus	ochraceus	Aspergillus ochraceus	118
Post Harvest	OTA	Ascomycota	Eurotiales	Aspergillus	ochraceus	Aspergillus ochraceus	118
Post Harvest	OTA	Ascomycota	Eurotiales	Aspergillus	ochraceus	Aspergillus ochraceus	118
Post Harvest	OTA	Ascomycota	Eurotiales	Aspergillus	ochraceus	Aspergillus ochraceus	118
Post Harvest	OTA	Ascomycota	Eurotiales	Aspergillus	ochraceus	Aspergillus ochraceus	118
Post Harvest	OTA	Ascomycota	Eurotiales	Aspergillus	ochraceus	Aspergillus ochraceus	118
Post Harvest	OTA	Ascomycota	Eurotiales	Aspergillus	ochraceus	Aspergillus ochraceus	118
Post Harvest	OTA	Ascomycota	Eurotiales	Aspergillus	ochraceus	Aspergillus ochraceus	118
Post Harvest	OTA	Ascomycota	Eurotiales	Aspergillus	ochraceus	Aspergillus ochraceus	118
Post Harvest	OTA	Ascomycota	Eurotiales	Aspergillus	ochraceus	Aspergillus ochraceus	118
Post Harvest	OTA	Ascomycota	Eurotiales	Aspergillus	ochraceus	Aspergillus ochraceus	118
Post Harvest	OTA	Ascomycota	Eurotiales	Aspergillus	ochraceus	Aspergillus ochraceus	118
Post Harvest	OTA	Ascomycota	Eurotiales	Aspergillus	ochraceus	Aspergillus ochraceus	118
Post Harvest	OTA	Ascomycota	Eurotiales	Aspergillus	ochraceus	Aspergillus ochraceus	118
Post Harvest	OTA	Ascomycota	Eurotiales	Aspergillus	ochraceus	Aspergillus ochraceus	118
Post Harvest	OTA	Ascomycota	Eurotiales	Aspergillus	ochraceus	Aspergillus ochraceus	118
Post Harvest	OTA	Ascomycota	Eurotiales	Aspergillus	ochraceus	Aspergillus ochraceus	118
Post Harvest	OTA	Ascomycota	Eurotiales	Aspergillus	ochraceus	Aspergillus ochraceus	118
Post Harvest	OTA	Ascomycota	Eurotiales	Aspergillus	ochraceus	Aspergillus ochraceus	118
Post Harvest	OTA	Ascomycota	Eurotiales	Aspergillus	ochraceus	Aspergillus ochraceus	118
Post Harvest	OTA	Ascomycota	Eurotiales	Aspergillus	ochraceus	Aspergillus ochraceus	118
Post Harvest	OTA	Ascomycota	Eurotiales	Aspergillus	ochraceus	Aspergillus ochraceus	118
Post Harvest	OTA	Ascomycota	Eurotiales	Aspergillus	ochraceus	Aspergillus ochraceus	118
Post Harvest	OTA	Ascomycota	Eurotiales	Aspergillus	ochraceus	Aspergillus ochraceus	118
Post Harvest	OTA	Ascomycota	Eurotiales	Aspergillus	ochraceus	Aspergillus ochraceus	118
Post Harvest	OTA	Ascomycota	Eurotiales	Aspergillus	ochraceus	Aspergillus ochraceus	118
Post Harvest	OTA	Ascomycota	Eurotiales	Aspergillus	ochraceus	Aspergillus ochraceus	118
Post Harvest	OTA	Ascomycota	Eurotiales	Aspergillus	ochraceus	Aspergillus ochraceus	118
Post Harvest	OTA	Ascomycota	Eurotiales	Aspergillus	ochraceus	Aspergillus ochraceus	118
Post Harvest	OTA	Ascomycota	Eurotiales	Aspergillus	ochraceus	Aspergillus ochraceus	118
Post Harvest	OTA	Ascomycota	Eurotiales	Aspergillus	ochraceus	Aspergillus ochraceus	118
Post Harvest	OTA	Ascomycota	Eurotiales	Aspergillus	ochraceus	Aspergillus ochraceus	132
Post Harvest	OTA	Ascomycota	Eurotiales	Aspergillus	ochraceus	Aspergillus ochraceus	132
Post Harvest	OTA	Ascomycota	Eurotiales	Aspergillus	ochraceus	Aspergillus ochraceus	132
Post Harvest	OTA	Ascomycota	Eurotiales	Aspergillus	ochraceus	Aspergillus ochraceus	132
Post Harvest	OTA	Ascomycota	Eurotiales	Aspergillus	ochraceus	Aspergillus ochraceus	132
Post Harvest	OTA	Ascomycota	Eurotiales	Aspergillus	ochraceus	Aspergillus ochraceus	136
Post Harvest	OTA	Ascomycota	Eurotiales	Aspergillus	ochraceus	Aspergillus ochraceus	136
Post Harvest	OTA	Ascomycota	Eurotiales	Aspergillus	ochraceus	Aspergillus ochraceus	146
Post Harvest	OTA	Ascomycota	Eurotiales	Aspergillus	ochraceus	Aspergillus ochraceus	146
Post Harvest	OTA	Ascomycota	Eurotiales	Aspergillus	ochraceus	Aspergillus ochraceus	147
Post Harvest	OTA	Ascomycota	Eurotiales	Aspergillus	ochraceus	Aspergillus ochraceus	149
Post Harvest	OTA	Ascomycota	Eurotiales	Aspergillus	ochraceus	Aspergillus ochraceus	154
Post Harvest	OTA	Ascomycota	Eurotiales	Aspergillus	ochraceus	Aspergillus ochraceus	166
Post Harvest	OTA	Ascomycota	Eurotiales	Aspergillus	ochraceus	Aspergillus ochraceus	167
Post Harvest	OTA	Ascomycota	Eurotiales	Aspergillus	ochraceus	Aspergillus ochraceus	181
Post Harvest	OTA	Ascomycota	Eurotiales	Aspergillus	ochraceus	Aspergillus ochraceus	182
Post Harvest	OTA	Ascomycota	Eurotiales	Aspergillus	ochraceus	Aspergillus ochraceus	191
Post Harvest	OTA	Ascomycota	Eurotiales	Aspergillus	ochraceus	Aspergillus ochraceus	192
Post Harvest	OTA	Ascomycota	Eurotiales	Aspergillus	ochraceus	Aspergillus ochraceus	194
Post Harvest	OTA	Ascomycota	Eurotiales	Aspergillus	ochraceus	Aspergillus ochraceus	197
Post Harvest	OTA	Ascomycota	Eurotiales	Aspergillus	ochraceus	Aspergillus ochraceus	197
Post Harvest	OTA	Ascomycota	Eurotiales	Aspergillus	ochraceus	Aspergillus ochraceus	202
Post Harvest	OTA	Ascomycota	Eurotiales	Aspergillus	ochraceus	Aspergillus ochraceus	215
Post Harvest	OTA	Ascomycota	Eurotiales	Aspergillus	ochraceus	Aspergillus ochraceus	215
Post Harvest	OTA	Ascomycota	Eurotiales	Aspergillus	ochraceus	Aspergillus ochraceus	216
Post Harvest	OTA	Ascomycota	Eurotiales	Aspergillus	ochraceus	Aspergillus ochraceus	216
Post Harvest	OTA	Ascomycota	Eurotiales	Aspergillus	ochraceus	Aspergillus ochraceus	219
Post Harvest	OTA	Ascomycota	Eurotiales	Aspergillus	ostianus	Aspergillus ostianus	22
Post Harvest	OTA	Ascomycota	Eurotiales	Aspergillus	ostianus	Aspergillus ostianus	23
Post Harvest	OTA	Ascomycota	Eurotiales	Aspergillus	ostianus	Aspergillus ostianus	166
Post Harvest	OTA	Ascomycota	Eurotiales	Aspergillus	petrakii	Aspergillus petrakii	23
Post Harvest	OTA	Ascomycota	Eurotiales	Aspergillus	sclerotiorum	Aspergillus sclerotiorum	7
Post Harvest	OTA	Ascomycota	Eurotiales	Aspergillus	sclerotiorum	Aspergillus sclerotiorum	21
Post Harvest	OTA	Ascomycota	Eurotiales	Aspergillus	sclerotiorum	Aspergillus sclerotiorum	22
Post Harvest	OTA	Ascomycota	Eurotiales	Aspergillus	sclerotiorum	Aspergillus sclerotiorum	23
Post Harvest	OTA	Ascomycota	Eurotiales	Aspergillus	sclerotiorum	Aspergillus sclerotiorum	24
Endophytic	OTA	Ascomycota	Eurotiales	Aspergillus	sclerotiorum	Aspergillus sclerotiorum	211
Post Harvest	OTA and OTB	Ascomycota	Eurotiales	Aspergillus	steynii	Aspergillus steynii	76
Post Harvest	OTA and OTB	Ascomycota	Eurotiales	Aspergillus	steynii	Aspergillus steynii	79
Post Harvest	OTA and OTB	Ascomycota	Eurotiales	Aspergillus	steynii	Aspergillus steynii	79
Post Harvest	OTA and OTB	Ascomycota	Eurotiales	Aspergillus	steynii	Aspergillus steynii	137
Post Harvest	OTA	Ascomycota	Eurotiales	Aspergillus	sulphureus	Aspergillus sulphureus	21
Post Harvest	OTA	Ascomycota	Eurotiales	Aspergillus	sulphureus	Aspergillus sulphureus	22
Post Harvest	OTA	Ascomycota	Eurotiales	Aspergillus	sulphureus	Aspergillus sulphureus	23
Post Harvest	OTA	Ascomycota	Eurotiales	Aspergillus	sulphureus	Aspergillus sulphureus	24
Post Harvest	OTA	Ascomycota	Eurotiales	Aspergillus	sulphureus	Aspergillus sulphureus	166
Post Harvest	OTA	Ascomycota	Eurotiales	Aspergillus	sulphureus	Aspergillus sulphureus	218
Post Harvest	OTA	Ascomycota	Eurotiales	Aspergillus	sulphureus	Aspergillus sulphureus	218
Post Harvest	OTA	Ascomycota	Eurotiales	Aspergillus	versicolor	Aspergillus versicolor	22
Post Harvest	OTA	Ascomycota	Eurotiales	Aspergillus	versicolor	Aspergillus versicolor	23
Post Harvest	OTA	Ascomycota	Eurotiales	Aspergillus	versicolor	Aspergillus versicolor	40
Post Harvest	OTA	Ascomycota	Eurotiales	Aspergillus	versicolor	Aspergillus versicolor	118
Post Harvest	OTA	Ascomycota	Eurotiales	Aspergillus	versicolor	Aspergillus versicolor	118
Post Harvest	OTA	Ascomycota	Eurotiales	Aspergillus	versicolor	Aspergillus versicolor	118
Post Harvest	OTA	Ascomycota	Eurotiales	Aspergillus	versicolor	Aspergillus versicolor	118
Post Harvest	OTA	Ascomycota	Eurotiales	Aspergillus	versicolor	Aspergillus versicolor	118
Post Harvest	OTA	Ascomycota	Eurotiales	Aspergillus	versicolor	Aspergillus versicolor	118
Post Harvest	OTA	Ascomycota	Eurotiales	Aspergillus	versicolor	Aspergillus versicolor	118
Post Harvest	OTA	Ascomycota	Eurotiales	Aspergillus	versicolor	Aspergillus versicolor	118
Post Harvest	OTA	Ascomycota	Eurotiales	Aspergillus	versicolor	Aspergillus versicolor	118
Post Harvest	OTA	Ascomycota	Eurotiales	Aspergillus	versicolor	Aspergillus versicolor	118
Post Harvest	OTA	Ascomycota	Eurotiales	Aspergillus	versicolor	Aspergillus versicolor	118
Post Harvest	OTA	Ascomycota	Eurotiales	Aspergillus	versicolor	Aspergillus versicolor	118
Post Harvest	OTA	Ascomycota	Eurotiales	Aspergillus	versicolor	Aspergillus versicolor	118
Post Harvest	OTA	Ascomycota	Eurotiales	Aspergillus	versicolor	Aspergillus versicolor	118
Post Harvest	OTA	Ascomycota	Eurotiales	Aspergillus	versicolor	Aspergillus versicolor	118
Post Harvest	OTA	Ascomycota	Eurotiales	Aspergillus	versicolor	Aspergillus versicolor	118
Post Harvest	OTA	Ascomycota	Eurotiales	Aspergillus	versicolor	Aspergillus versicolor	118
Post Harvest	OTA	Ascomycota	Eurotiales	Aspergillus	versicolor	Aspergillus versicolor	118
Post Harvest	OTA	Ascomycota	Eurotiales	Aspergillus	versicolor	Aspergillus versicolor	118
Post Harvest	OTA	Ascomycota	Eurotiales	Aspergillus	versicolor	Aspergillus versicolor	118
Post Harvest	OTA	Ascomycota	Eurotiales	Aspergillus	versicolor	Aspergillus versicolor	118
Post Harvest	OTA	Ascomycota	Eurotiales	Aspergillus	versicolor	Aspergillus versicolor	118
Post Harvest	OTA	Ascomycota	Eurotiales	Aspergillus	versicolor	Aspergillus versicolor	118
Post Harvest	OTA	Ascomycota	Eurotiales	Aspergillus	versicolor	Aspergillus versicolor	118
Post Harvest	OTA	Ascomycota	Eurotiales	Aspergillus	versicolor	Aspergillus versicolor	118
Post Harvest	OTA	Ascomycota	Eurotiales	Aspergillus	versicolor	Aspergillus versicolor	118
Post Harvest	OTA	Ascomycota	Eurotiales	Aspergillus	versicolor	Aspergillus versicolor	118
Post Harvest	OTA	Ascomycota	Eurotiales	Aspergillus	versicolor	Aspergillus versicolor	118
Post Harvest	OTA	Ascomycota	Eurotiales	Aspergillus	versicolor	Aspergillus versicolor	118
Post Harvest	OTA	Ascomycota	Eurotiales	Aspergillus	versicolor	Aspergillus versicolor	118
Post Harvest	OTA	Ascomycota	Eurotiales	Aspergillus	versicolor	Aspergillus versicolor	118
Endophytic	OTA	Ascomycota	Eurotiales	Aspergillus	versicolor	Aspergillus versicolor	177
Post Harvest	OTA	Ascomycota	Eurotiales	Aspergillus	versicolor	Aspergillus versicolor	197
Post Harvest	OTA	Ascomycota	Eurotiales	Aspergillus	versicolor	Aspergillus versicolor	197
Post Harvest	OTA	Ascomycota	Eurotiales	Aspergillus	versicolor	Aspergillus versicolor	219
Post Harvest	OTA and OTB	Ascomycota	Eurotiales	Aspergillus	westerdijkiae	Aspergillus westerdijkiae	7
Post Harvest	OTA and OTB	Ascomycota	Eurotiales	Aspergillus	westerdijkiae	Aspergillus westerdijkiae	54
Post Harvest	OTA and OTB	Ascomycota	Eurotiales	Aspergillus	westerdijkiae	Aspergillus westerdijkiae	76
Post Harvest	OTA and OTB	Ascomycota	Eurotiales	Aspergillus	westerdijkiae	Aspergillus westerdijkiae	79
Post Harvest	OTA and OTB	Ascomycota	Eurotiales	Aspergillus	westerdijkiae	Aspergillus westerdijkiae	79
Post Harvest	OTA and OTB	Ascomycota	Eurotiales	Aspergillus	westerdijkiae	Aspergillus westerdijkiae	87
Post Harvest	OTA and OTB	Ascomycota	Eurotiales	Aspergillus	westerdijkiae	Aspergillus westerdijkiae	137
Post Harvest	OTA and OTB	Ascomycota	Eurotiales	Aspergillus	westerdijkiae	Aspergillus westerdijkiae	137
Endophytic	OTA and OTB	Ascomycota	Eurotiales	Aspergillus	westerdijkiae	Aspergillus westerdijkiae	156
Endophytic	OTA and OTB	Ascomycota	Eurotiales	Aspergillus	westerdijkiae	Aspergillus westerdijkiae	211
Post Harvest	OTA	Ascomycota	Eurotiales	Byssochlamys	spectabilis	Byssochlamys spectabilis	40
Post Harvest	OTA	Ascomycota	Eurotiales	Penicillium	brevicompactum	Penicillium brevicompactum	1
Post Harvest	OTA	Ascomycota	Eurotiales	Penicillium	brevicompactum	Penicillium brevicompactum	21
Post Harvest	OTA	Ascomycota	Eurotiales	Penicillium	brevicompactum	Penicillium brevicompactum	23
Rhizospheric	OTA	Ascomycota	Eurotiales	Penicillium	brevicompactum	Penicillium brevicompactum	84
Post Harvest	OTA	Ascomycota	Eurotiales	Penicillium	brevicompactum	Penicillium brevicompactum	87
Epiphytic	OTA	Ascomycota	Eurotiales	Penicillium	brevicompactum	Penicillium brevicompactum	89
Epiphytic	OTA	Ascomycota	Eurotiales	Penicillium	brevicompactum	Penicillium brevicompactum	89
Post Harvest	OTA	Ascomycota	Eurotiales	Penicillium	brevicompactum	Penicillium brevicompactum	118
Post Harvest	OTA	Ascomycota	Eurotiales	Penicillium	brevicompactum	Penicillium brevicompactum	118
Post Harvest	OTA	Ascomycota	Eurotiales	Penicillium	brevicompactum	Penicillium brevicompactum	118
Post Harvest	OTA	Ascomycota	Eurotiales	Penicillium	brevicompactum	Penicillium brevicompactum	118
Post Harvest	OTA	Ascomycota	Eurotiales	Penicillium	brevicompactum	Penicillium brevicompactum	118
Post Harvest	OTA	Ascomycota	Eurotiales	Penicillium	brevicompactum	Penicillium brevicompactum	118
Post Harvest	OTA	Ascomycota	Eurotiales	Penicillium	brevicompactum	Penicillium brevicompactum	118
Post Harvest	OTA	Ascomycota	Eurotiales	Penicillium	brevicompactum	Penicillium brevicompactum	118
Post Harvest	OTA	Ascomycota	Eurotiales	Penicillium	brevicompactum	Penicillium brevicompactum	118
Post Harvest	OTA	Ascomycota	Eurotiales	Penicillium	brevicompactum	Penicillium brevicompactum	118
Post Harvest	OTA	Ascomycota	Eurotiales	Penicillium	brevicompactum	Penicillium brevicompactum	118
Post Harvest	OTA	Ascomycota	Eurotiales	Penicillium	brevicompactum	Penicillium brevicompactum	118
Post Harvest	OTA	Ascomycota	Eurotiales	Penicillium	brevicompactum	Penicillium brevicompactum	118
Post Harvest	OTA	Ascomycota	Eurotiales	Penicillium	brevicompactum	Penicillium brevicompactum	118
Post Harvest	OTA	Ascomycota	Eurotiales	Penicillium	brevicompactum	Penicillium brevicompactum	118
Post Harvest	OTA	Ascomycota	Eurotiales	Penicillium	brevicompactum	Penicillium brevicompactum	118
Post Harvest	OTA	Ascomycota	Eurotiales	Penicillium	brevicompactum	Penicillium brevicompactum	118
Post Harvest	OTA	Ascomycota	Eurotiales	Penicillium	brevicompactum	Penicillium brevicompactum	118
Post Harvest	OTA	Ascomycota	Eurotiales	Penicillium	brevicompactum	Penicillium brevicompactum	118
Post Harvest	OTA	Ascomycota	Eurotiales	Penicillium	brevicompactum	Penicillium brevicompactum	118
Post Harvest	OTA	Ascomycota	Eurotiales	Penicillium	brevicompactum	Penicillium brevicompactum	118
Post Harvest	OTA	Ascomycota	Eurotiales	Penicillium	brevicompactum	Penicillium brevicompactum	118
Endophytic	OTA	Ascomycota	Eurotiales	Penicillium	brevicompactum	Penicillium brevicompactum	156
Post Harvest	OTA	Ascomycota	Eurotiales	Penicillium	brevicompactum	Penicillium brevicompactum	167
Post Harvest	OTA	Ascomycota	Eurotiales	Penicillium	brevicompactum	Penicillium brevicompactum	181
Post Harvest	OTA	Ascomycota	Eurotiales	Penicillium	brevicompactum	Penicillium brevicompactum	182
Endophytic	OTA	Ascomycota	Eurotiales	Penicillium	brevicompactum	Penicillium brevicompactum	210
Endophytic	OTA	Ascomycota	Eurotiales	Penicillium	brevicompactum	Penicillium brevicompactum	210
Endophytic	OTA	Ascomycota	Eurotiales	Penicillium	brevicompactum	Penicillium brevicompactum	210
Endophytic	OTA	Ascomycota	Eurotiales	Penicillium	brevicompactum	Penicillium brevicompactum	211
Endophytic	OTA	Ascomycota	Eurotiales	Penicillium	brevicompactum	Penicillium brevicompactum	211
Endophytic	OTA	Ascomycota	Eurotiales	Penicillium	brevicompactum	Penicillium brevicompactum	211
Post Harvest	OTA	Ascomycota	Eurotiales	Penicillium	brevicompactum	Penicillium brevicompactum	219
Post Harvest	OTA	Ascomycota	Eurotiales	Penicillium	crustosum	Penicillium crustosum	167
Post Harvest	OTA	Ascomycota	Eurotiales	Penicillium	crustosum	Penicillium crustosum	181
Post Harvest	OTA	Ascomycota	Eurotiales	Penicillium	crustosum	Penicillium crustosum	182
Post Harvest	OTA	Ascomycota	Eurotiales	Penicillium	crustosum	Penicillium crustosum	183
Post Harvest	OTA	Ascomycota	Eurotiales	Penicillium	crustosum	Penicillium crustosum	208
Endophytic	OTA	Ascomycota	Eurotiales	Penicillium	crustosum	Penicillium crustosum	210
Endophytic	OTA	Ascomycota	Eurotiales	Penicillium	crustosum	Penicillium crustosum	211
Endophytic	OTA	Ascomycota	Eurotiales	Penicillium	crustosum	Penicillium crustosum	211
Post Harvest	OTA	Ascomycota	Eurotiales	Penicillium	olsonii	Penicillium olsonii	71
Post Harvest	OTA	Ascomycota	Eurotiales	Penicillium	olsonii	Penicillium olsonii	208
Endophytic	OTA	Ascomycota	Eurotiales	Penicillium	olsonii	Penicillium olsonii	210
Endophytic	OTA	Ascomycota	Eurotiales	Penicillium	olsonii	Penicillium olsonii	210
Endophytic	OTA	Ascomycota	Eurotiales	Penicillium	olsonii	Penicillium olsonii	210
Endophytic	OTA	Ascomycota	Eurotiales	Penicillium	olsonii	Penicillium olsonii	210
Endophytic	OTA	Ascomycota	Eurotiales	Penicillium	olsonii	Penicillium olsonii	211
Endophytic	OTA	Ascomycota	Eurotiales	Penicillium	olsonii	Penicillium olsonii	211
Endophytic	OTA	Ascomycota	Eurotiales	Penicillium	olsonii	Penicillium olsonii	211
Endophytic	OTA	Ascomycota	Eurotiales	Penicillium	olsonii	Penicillium olsonii	211
Endophytic	OTA	Ascomycota	Eurotiales	Penicillium	olsonii	Penicillium olsonii	211
Post Harvest	OTA	Ascomycota	Eurotiales	Penicillium	oxalicum	Penicillium oxalicum	6
Post Harvest	OTA	Ascomycota	Eurotiales	Penicillium	oxalicum	Penicillium oxalicum	7
Endophytic	OTA	Ascomycota	Eurotiales	Penicillium	oxalicum	Penicillium oxalicum	210
Endophytic	OTA	Ascomycota	Eurotiales	Penicillium	oxalicum	Penicillium oxalicum	211
Post Harvest	OTA	Ascomycota	Eurotiales	Penicillium	verruculosum	Penicillium verruculosum	7
Reference No.	References (reference describing toxins production by at least one isolated of the species above in bold)
1	Abdel-Hafez, A. I. I., and El-Maghraby, O. M. O. (1992). Fungal flora and aflatoxin associated with cocoa, roasted coffee and tea powders in Egypt. Cryptogamie Mycologie 3, 31–45.
2	Agate, A. D., and Bhat, J. V. (1966). Role of Pectinolytic Yeasts in the Degradation of Mucilage Layer of Coffea robusta Cherries. APPLIED MICROBIOLOGY 14, 256–260.
3	Ahmad, R., and Magan, N. (2002). Microfloral contamination and hydrolytic enzyme differences between monsooned and non-monsooned coffees. Letters in Applied Microbiology 34, 279–282. doi:10.1046/j.1472-765x.2002.01080.x.
4	Al-Arequi, A., Chliyeh, M., Sghir, F., Ouazzani Touhami, A., Benkirane, R., and Douira, A. (2013). Diversity of arbuscular mycorrhizal fungi in the rhizosphere of Coffea arabica in the Republic of Yemen. Journal of Applied Biosciences 64, 4888–4901. doi:10.4314/jab.v64i1.88478.
5	Alves, E., and De Castro, H. A. (1998). Fungos associados ao café (Coffea arabica L.) beneficiado e as fases pré e pós-colheita em lavouras da região de Lavras. Summa Phytophatologica 24, 4–7.
6	Alvindia, D. G., and Acda, M. A. (2010). Mycoflora of coffee beans in the Philippines. Journal of the International Society for Southeast Asian Agricultural Sciences 16, 116–125.
7	Alvindia, D. G., and de Guzman, M. F. (2016). Survey of Philippine coffee beans for the presence of ochratoxigenic fungi. Mycotoxin Research 32, 61–67. doi:10.1007/s12550-016-0240-3.
8	Antier, P., Minjares, A., Roussos, S., Raimbault, M., and Viniegra-Gonzalez, G. (1993). Pectinase-hyperproducing mutants of Aspergillus niger C28B25 for solid-state fermentation of coffee pulp. Enzyme and Microbial Technology 15, 254–260. doi:10.1016/0141-0229(93)90146-S.
9	Aquiahuatl, M. A., Raimbault, M., Roussos, S., and Trejo, M. R. (1988). Coffee pulp detoxification by solid state fermentation: isolation, identification and physiological studies. in (Solid State Fermentation in Bioconversion of Agroindustrial Raw Materials, ORSTOM, Montpellier, France: Raimbault, M., Ed.), 13–26.
10	Arias, R. M., Heredia-Abarca, G., Sosa, V. J., and Fuentes-Ramírez, L. E. (2012). Diversity and abundance of arbuscular mycorrhizal fungi spores under different coffee production systems and in a tropical montane cloud forest patch in Veracruz, Mexico. Agroforestry Systems 85, 179–193. doi:10.1007/s10457-011-9414-3.
11	Arimurti, S., Ardyati, T., Nurani, Y., Siswoyo, T. A., and Suharjono, S. (2018). Degradation of caffeine by Pseudomonas monteilii KRM9. Malaysian Journal of Microbiology 14, 55–60.
12	Arimurti, S., Nurani, Y., Ardyati, T., and Suharjono, S. (2017). Screening and identification of indigenous cellulolytic bacteria from indonesian coffee pulp and investigation of its caffeine tolerance ability. Malaysian Journal of Microbiology 12, 109–116. doi:10.21161/mjm.86416.
13	Asyiah, I. N., Husain, M., Iqbal, M., Hindersah, R., Narulita, E., and Mudakir, I. (2018). The endophytic bacteria isolation as biological control agent of Pratylenchus coffeae. Asian Journal of Microbiology, Biotechnology & Environmental Sciences 20, 165–171.
14	Avallone, S., Brillouet, J. M., Guyot, B., Olguin, E., and Guiraud, J. P. (2002). Involvement of pectolytic micro-organisms in coffee fermentation. International Journal of Food Science and Technology 37, 191–198. doi:10.1046/j.1365-2621.2002.00556.x.
15	Avallone, S., Guyot, B., Brillouet, J.-M., Olguin, E., and Guiraud, J.-P. (2001). Microbiological and Biochemical Study of Coffee Fermentation. Current Microbiology 42, 252–256. doi:10.1007/s002840110213.
16	Baker, S., and Shreedharmurthy, S. (2012). Antimicrobial activity and biosynthesis of nanoparticles by endophytic bacterium inhabiting Coffee arabica L. Scientific Journal of Biological Sciences 1, 107–113.
17	Balota, E. L., and Lopes, E. S. (1996a). Introdução de fungo micorrizico arbuscular no cafeeiro em condições de campo: I. Persistência e interação com espécies nativas. Revista Brasileira de Ciência do Solo 20, 217–223.
18	Balota, E. L., and Lopes, E. S. (1996b). Introdução de fungo micorrízico arbuscular no cafeeiro em condições de campo: II. Flutuação sazonal de raízes, de colonização e de fungos micorrízicos arbusculares associados. Revista Brasileira de Ciência do Solo 20, 225–232.
19	Baon, J. B., Wedhastri, S., and Kurniawan, A. (2012). The Ability of Phosphate Solubilizing Bacteria Isolated from Coffee Plant Rhizosphere and Their Effects on Robusta Coffee Seedlings. Journal of Agricultural Science and Technology A 2, 1064–1070.
20	Barbosa, M. V., de Fátima, D. P., and Carbone, M. A. (2015). Influência do tempo de cultivo do cafeeiro na diversidade e densidade de esporos de fungos micorrízicos arbusculares. XXXV Congresso Brasileiro de Ciência do Solo, 1–4.
21	Batista, L. R., and Chalfoun, S. M. (2007). Incidência de ocratoxina a em diferentes frações do café (Coffea arabica L.): bóia, mistura e varrição após secagem em terreiros de terra, asfalto e cimentoterreiros. Ciênc. agrotec. 31, 804–813.
22	Batista, L. R., Chalfoun, S. M., and Prado, G. (2001). Identificação de espécies toxigenicas de Aspergillus associadas aos grãos de café armazenados. Revista Brasileira de Armazenamento 3, 11–16.
23	Batista, L. R., Chalfoun, S. M., Prado, G., Schwan, R. F., and Wheals, A. E. (2003). Toxigenic fungi associated with processed (green) coffee beans (Coffea arabica L.). International Journal of Food Microbiology 85, 293–300. doi:10.1016/S0168-1605(02)00539-1.
24	Batista, L. R., Chalfoun, S. M., Silva, C. F., Cirillo, M., Varga, E. A., and Schwan, R. F. (2009). Ochratoxin A in coffee beans (Coffea arabica L.) processed by dry and wet methods. Food Control 20, 784–790. doi:10.1016/j.foodcont.2008.10.003.
25	Bertolini, V., Montaño, N. M., Salazar-Ortuño, B. L., Chimal-Sánchez, E., and Varela, L. (2020). Diversidad de hongos micorrizógenos arbusculares en plantaciones de café (Coffea arabica) del volcán Tacaná, Chiapas, México. Acta Botanica Mexicana 127, 1–16. doi:10.21829/abm127.2020.1602.
26	Bertolini, V., Montaño, N. M., Sánchez, E. C., Fregoso, L. V., Ruiz, J. G., and Vázquez, J. M. M. (2018). Abundancia y riqueza de hongos micorrizógenos arbusculares en cafetales de Soconusco, Chiapas, México. Rev. Biol. Trop. 66, 91–105.
27	Bettiol, W., Silva, H. S. A., de Melo, I. S., Terrasan, C. R. F., Tozzi, J. P. L., and Nunes, F. V. (2007). Endophytic bacteria for biocontrol of coffee leaf rust (Hemileia vastatrix). in (Spa, Belgium: IOBC-WPRS, Bulletin OILB-SROP), 68.
28	Boccas, F., Roussos, S., Gutierrez, M., Serrano, L., and Viniegra-Gonzalez, G. (1994). Production of Pectinase from Coffee Pulp in Solid State Fermentation System. Journal of Food Science and Technology 31, 22–26.
29	Bolaños-Benavides, M. M., Rivillas-Osorio, C. A., and Suárez-Vásquez, S. (2000). Identificación de micorrizas arbusculares en suelos de la zona cafetera colombiana. Cenicafé 51, 245–262.
30	Bongiorno, V. A., Rhoden, S. A., Garcia, A., Polonio, J. C., Azevedo, J. L., Pereira, J. O., et al. (2016). Genetic diversity of endophytic fungi from Coffea arabica cv. IAPAR-59 in organic crops. Annals of Microbiology 66, 855–865. doi:10.1007/s13213-015-1168-0.
31	Botelho, A. O., Campos, V. P., da Silva, J. C. P., Freire, E. S., de Pinho, R. S. C., Barros, A. F., et al. (2019). Physicochemical and biological properties of the coffee (Coffea arabica) rhizosphere suppress the root-knot nematode Meloidogyne exigua. Biocontrol Science and Technology 29, 1181–1196. doi:10.1080/09583157.2019.1670781.
32	Bozza, A., Tralamazza, S. M., Reynaud, D. T., Gabardo, J., Valaski, J. C., Marangoni, P. R., et al. (2009). Isolamento de fungos associados a grãos de café cv. Iapar 59 de origem de solo e árvore em diferentes tempos de colheita. Ciência e Tecnologia de Alimentos 29, 529–534. doi:10.1590/S0101-20612009000300012.
33	Brand, D., Pandey, A., Roussos, S., and Soccol, C. R. (2000). Biological detoxification of coffee husk by filamentous fungi using a solid state fermentation system. Enzyme and Microbial Technology 27, 127–133. doi:10.1016/S0141-0229(00)00186-1.
34	Bressani, A. P. P., Martinez, S. J., Sarmento, A. B. I., Borém, F. M., and Schwan, R. F. (2020). Organic acids produced during fermentation and sensory perception in specialty coffee using yeast starter culture. Food Research International 128, 108773. doi:10.1016/j.foodres.2019.108773.
35	Bucheli, P., Kanchanomai, C., Meyer, I., and Pittet, A. (2000). Development of Ochratoxin A during Robusta (Coffea canephora) Coffee Cherry Drying. Journal of Agricultural and Food Chemistry 48, 1358–1362. doi:10.1021/jf9905875.
36	Bucheli, P., Meyer, I., Pittet, A., Vuataz, G., and Viani, R. (1998). Industrial Storage of Green Robusta Coffee under Tropical Conditions and Its Impact on Raw Material Quality and Ochratoxin A Content. Journal of Agricultural and Food Chemistry 46, 4507–4511.
37	Bui, H. B. (2014). Isolation of cellulolytic bacteria, including actinomycetes, from coffee exocarps in coffee-producing areas in Vietnam. International Journal of Recycling of Organic Waste in Agriculture 3, 8. doi:10.1007/s40093-014-0048-0.
38	Caldeira, S. F., Chaves, G. M., and Zambolim, L. (1983). Associação de micorriza vesicular-arbuscular com café, limão-rosa e capim-gordura. Pesquisa Agropecuária Brasileira 18, 223–228.
39	Carrion, G., and Rico-Gray, V. (2002). Mycoparasites on the coffee rust in Mexico. Fungal Diversity 11, 49–60.
40	Casas-Junco, P. P., Ragazzo-Sánchez, J. A., Ascencio-Valle, F. de J., and Calderón-Santoyo, M. (2018). Determination of potentially mycotoxigenic fungi in coffee (Coffea arabica L.) from Nayarit. Food Science and Biotechnology 27, 891–898. doi:10.1007/s10068-017-0288-7.
41	Castillo, J. M., Casas, J., and Romero, E. (2011). Isolation of an endosulfan-degrading bacterium from a coffee farm soil: Persistence and inhibitory effect on its biological functions. Science of The Total Environment 412–413, 20–27. doi:10.1016/j.scitotenv.2011.09.062.
42	Castro, L. A. F., and García, M. R. (2012). Caracterización de las endomicorrizas y siete grupos de microorganismos en agrosistemas del Piedemonte Amazónico, Colombia. Acta Biológica Colombiana 17, 349–362.
43	Chalfoun, S. M., Cunha, R. L. da, Carvalho, V. L. de, and Nogueira, D. A. (2007). Seletividade de fungicidas cúpricos e sistêmicos sobre o fungo Cladosporium cladosporioides em cafeeiro. Summa Phytopathologica 33, 93–95. doi:10.1590/S0100-54052007000100016.
44	Chattopadhyay, N., Swain, S., and Hore, J. K. (2006). Response of coffee seedlings to nitrogen fixing biofertilizers. Agricultural Science Digest 26, 103–106.
45	Chaves, F. C., Gianfagna, T. J., Aneja, M., Posada, F., Peterson, S. W., and Vega, F. E. (2012). Aspergillus oryzae NRRL 35191 from coffee, a non-toxigenic endophyte with the ability to synthesize kojic acid. Mycological Progress 11, 263–267. doi:10.1007/s11557-011-0745-2.
46	Cisneros-Rojas, C. A., Sánchez-de Prager, M., and Menjivar-Flores, J. C. (2017). Efecto de bacterias solubilizadoras de fosfatos sobre el desarrollo de plántulas de café. Agronomía Mesoamericana 28, 149–158. doi:10.15517/am.v28i1.22021.
47	Colozzi Filho, A., and Cardoso, E. J. B. N. (2000). Detecção de fungos micorrízicos arbusculares em raízes de cafeeiro e de crotalária cultivada na entrelinha. Pesquisa Agropecuária Brasileira 35, 2033–2042. doi:10.1590/S0100-204X2000001000015.
48	Colozzi-Filho, A., Siqueira, J. O., Saggin Junior, O. J., Guimarães, P. T. G., and Oliveira, E. (1994). Efetividade de diferentes fungos micorrízicos arbusculares na formação de mudas, crescimento pós-transplante e produção do cafeeiro. Pesquisa Agropecuária Brasileira 29, 1397–1406.
49	Compri, L., Florentino, L. A., Veiga, R. M., Da Silva, A. B., and Miranda, J. M. (2016). Diversidade de microrganismos em frutos do cafeeiro cultivado na proximidade do Lago de Furnas. Coffee Science, Lavras 11, 285–289.
50	Costa, M. J. N., Zambolim, L., and Rodrigues, F. A. (2007). Avaliação de produtos alternativos no controle da ferrugem do cafeeiro. Fitopatologia Brasileira 32, 150–155. doi:10.1590/S0100-41582007000200010.
51	Culliao, A. G. L., and Barcelo, J. M. (2015). Fungal and mycotoxin contamination of coffee beans in Benguet province, Philippines. Food Additives & Contaminants: Part A 32, 250–260. doi:10.1080/19440049.2014.1001796.
52	Da Silva Vale, A., de Melo Pereira, G. V., de Carvalho Neto, D. P., Rodrigues, C., Pagnoncelli, M. G. B., and Soccol, C. R. (2019). Effect of Co-Inoculation with Pichia fermentans and Pediococcus acidilactici on Metabolite Produced During Fermentation and Volatile Composition of Coffee Beans. Fermentation 5, 67. doi:10.3390/fermentation5030067.
53	Daivasikamani, S., and Rajanaika (2009). Biological control of coffee leaf rust pathogen, Hemileia vastatrix Berkeley and Broome using Bacillus subtilis and Pseudomonas fluorescens. Journal of Biopesticides 2, 94–98.
54	De Almeida, Â. B., Corrêa, I. P., Furuie, J. L., De Farias Pires, T., Do Rocio Dalzoto, P., and Pimentel, I. C. (2019). Inhibition of growth and ochratoxin A production in Aspergillus species by fungi isolated from coffee beans. Brazilian Journal of Microbiology 50, 1091–1098. doi:10.1007/s42770-019-00152-9.
55	De Beenhouwer, M., Muleta, D., Peeters, B., Van Geel, M., Lievens, B., and Honnay, O. (2015a). DNA pyrosequencing evidence for large diversity differences between natural and managed coffee mycorrhizal fungal communities. Agronomy for Sustainable Development 35, 241–249. doi:10.1007/s13593-014-0231-8.
56	De Beenhouwer, M., Van Geel, M., Ceulemans, T., Muleta, D., Lievens, B., and Honnay, O. (2015b). Changing soil characteristics alter the arbuscular mycorrhizal fungi communities of Arabica coffee (Coffea arabica) in Ethiopia across a management intensity gradient. Soil Biology and Biochemistry 91, 133–139. doi:10.1016/j.soilbio.2015.08.037.
57	De Bruyn, F., Zhang, S. J., Pothakos, V., Torres, J., Lambot, C., Moroni, A. V., et al. (2017). Exploring the Impacts of Postharvest Processing on the Microbiota and Metabolite Profiles during Green Coffee Bean Production. Applied and Environmental Microbiology 83. doi:10.1128/AEM.02398-16.
58	De Bruyne, K., Schillinger, U., Caroline, L., Boehringer, B., Cleenwerck, I., Vancanneyt, M., et al. (2007). Leuconostoc holzapfelii sp. nov., isolated from Ethiopian coffee fermentation and assessment of sequence analysis of housekeeping genes for delineation of Leuconostoc species. INTERNATIONAL JOURNAL OF SYSTEMATIC AND EVOLUTIONARY MICROBIOLOGY 57, 2952–2959. doi:10.1099/ijs.0.65292-0.
59	De Carvalho Neto, D., De Melo Pereira, G., Tanobe, V., Thomaz Soccol, V., G. da Silva, B., Rodrigues, C., et al. (2017). Yeast Diversity and Physicochemical Characteristics Associated with Coffee Bean Fermentation from the Brazilian Cerrado Mineiro Region. Fermentation 3, 11. doi:10.3390/fermentation3010011.
60	De Carvalho Neto, D. P., De Melo Pereira, G. V., De Carvalho, J. C., Soccol, V. T., and Soccol, C. R. (2018). High-Throughput rRNA Gene Sequencing Reveals High and Complex Bacterial Diversity Associated with Brazilian Coffee Beans Fermentation. Food Technology and Biotechnology 56, 90–95. doi:10.17113/ftb.56.01.18.5441.
61	De Melo Pereira, G. V., Beux, M., Pagnoncelli, M. G. B., Soccol, V. T., Rodrigues, C., and Soccol, C. R. (2015a). Isolation, selection and evaluation of antagonistic yeasts and lactic acid bacteria against ochratoxigenic fungus Aspergillus westerdijkiae on coffee beans. Letters in Applied Microbiology 62, 96–101. doi:10.1111/lam.12520.
62	De Melo Pereira, G. V. de M., de Carvalho Neto, D. P., Medeiros, A. B. P., Soccol, V. T., Neto, E., Woiciechowski, A. L., et al. (2016). Potential of lactic acid bacteria to improve the fermentation and quality of coffee during on-farm processing. International Journal of Food Science & Technology 51, 1689–1695. doi:10.1111/ijfs.13142.
63	De Melo Pereira, G. V., Neto, E., Soccol, V. T., Medeiros, A. B. P., Woiciechowski, A. L., and Soccol, C. R. (2015b). Conducting starter culture-controlled fermentations of coffee beans during on-farm wet processing: Growth, metabolic analyses and sensorial effects. Food Research International 75, 348–356. doi:10.1016/j.foodres.2015.06.027.
64	De Melo Pereira, G. V., Soccol, V. T., Pandey, A., Medeiros, A. B. P., Andrade Lara, J. M. R., Gollo, A. L., et al. (2014). Isolation, selection and evaluation of yeasts for use in fermentation of coffee beans by the wet process. International Journal of Food Microbiology 188, 60–66. doi:10.1016/j.ijfoodmicro.2014.07.008.
65	De Oliveira Junqueira, A. C., de Melo Pereira, G. V., Coral Medina, J. D., Alvear, M. C. R., Rosero, R., de Carvalho Neto, D. P., et al. (2019). First description of bacterial and fungal communities in Colombian coffee beans fermentation analysed using Illumina-based amplicon sequencing. Scientific Reports 9. doi:10.1038/s41598-019-45002-8.
66	Djossou, O., Perraud-Gaime, I., Lakhal Mirleau, F., Rodriguez-Serrano, G., Karou, G., Niamke, S., et al. (2011). Robusta coffee beans post-harvest microflora: Lactobacillus plantarum sp. as potential antagonist of Aspergillus carbonarius. Anaerobe 17, 267–272. doi:10.1016/j.anaerobe.2011.03.006.
67	Estrada-De Los Santos, P., Bustillos-Cristales, R., and Caballero-Mellado, J. (2001). Burkholderia, a Genus Rich in Plant-Associated Nitrogen Fixers with Wide Environmental and Geographic Distribution. Applied and Environmental Microbiology 67, 2790–2798. doi:10.1128/AEM.67.6.2790-2798.2001.
68	Evangelista, S. R., da Cruz Pedrozo Miguel, M. G., de Souza Cordeiro, C., Silva, C. F., Marques Pinheiro, A. C., and Schwan, R. F. (2014a). Inoculation of starter cultures in a semi-dry coffee (Coffea arabica) fermentation process. Food Microbiology 44, 87–95. doi:10.1016/j.fm.2014.05.013.
69	Evangelista, S. R., Miguel, M. G. da C. P., Silva, C. F., Pinheiro, A. C. M., and Schwan, R. F. (2015). Microbiological diversity associated with the spontaneous wet method of coffee fermentation. International Journal of Food Microbiology 210, 102–112. doi:10.1016/j.ijfoodmicro.2015.06.008.
70	Evangelista, S. R., Silva, C. F., Miguel, M. G. P. da C., Cordeiro, C. de S., Pinheiro, A. C. M., Duarte, W. F., et al. (2014b). Improvement of coffee beverage quality by using selected yeasts strains during the fermentation in dry process. Food Research International 61, 183–195. doi:10.1016/j.foodres.2013.11.033.
71	Feng, X., Dong, H., Yang, P., Yang, R., Lu, J., Lv, J., et al. (2016). Culture-Dependent and -Independent Methods to Investigate the Predominant Microorganisms Associated with Wet Processed Coffee. Current Microbiology 73, 190–195. doi:10.1007/s00284-016-1047-3.
72	Fernandes, A. B., and Siqueira, J. O. (1989). Micorrizas Vesicular-Arbusculares em cafeeiros da região sul do estado de Minas Gerais. Pesquisa Agropecuária Brasileira 24, 1489–149810.
73	Fernandes, M. dos R. V., Silva, T. A. C. e, Pfenning, L. H., Costa-Neto, C. M. da, Heinrich, T. A., Alencar, S. M. de, et al. (2009). Biological activities of the fermentation extract of the endophytic fungus Alternaria alternata isolated from Coffea arabica L. Brazilian Journal of Pharmaceutical Sciences 45, 677–685. doi:10.1590/S1984-82502009000400010.
74	Ferreira, G. F. P., Novaes, Q. S. de, Batista, L. R., Souza, S. E. de, Azevedo, G. B. de, and Silva, D. M. da (2011). Fungos associados a grãos de café (Coffea arabica L.) beneficiados no sudoeste da Bahia. Summa Phytopathologica 37, 98–102. doi:10.1590/S0100-54052011000300003.
75	Frank, H. A., Lum, N. A., and Cruz, A. S. D. (1965). Bacteria Responsible for Mucilage-Layer Decomposition in Kona Coffee Cherries. APPLIED MICROBIOLOGY 13, 201–207.
76	Frisvad, J. C., Frank, J. M., and Samson, R. A. (2004). New ochratoxin A producing species of Aspergillus section Circumdati. Studies in Mycology 50, 23–43.
77	Fuentes-Ramírez, L. E., Bustillos-Cristales, R., Tapia-Hernández, A., Jiménez-Salgado, T., Wang, E. T., Martínez-Romero, E., et al. (2001). Novel nitrogen-fixing acetic acid bacteria, Gluconacetobacter johannae sp. nov. and Gluconacetobacter azotocaptans sp. nov., associated with coffee plants. International Journal of Systematic and Evolutionary Microbiology 51, 1305–1314. doi:10.1099/00207713-5…
78	Fulthorpe, R., Martin, A. R., and Isaac, M. E. (2020). Root Endophytes of Coffee (Coffea arabica): Variation Across Climatic Gradients and Relationships with Functional Traits. Phytobiomes Journal 4, 27–39. doi:10.1094/PBIOMES-04-19-0021-R.
79	Geremew, T., Abate, D., Landschoot, S., Haesaert, G., and Audenaert, K. (2016). Occurrence of toxigenic fungi and ochratoxin A in Ethiopian coffee for local consumption. Food Control 69, 65–73. doi:10.1016/j.foodcont.2016.04.025.
80	González, C. B., Esmoris, C. S., and Rodríguez, M. I. (2004). Utilización de Azotobacter en Coffea arabica L y Coffea canephora Pierre ex Froehner. Resultados de 13 años de investigaciones. in (Cuba), 15.
81	Haddad, F., Saraiva, R. M., Mizubuti, E. S. G., Romeiro, R. S., and Maffia, L. A. (2013). Antifungal compounds as a mechanism to control Hemileia vastatrix by antagonistic bacteria. Tropical Plant Pathology 38, 398–405. doi:10.1590/S1982-56762013000500004.
82	Haddad, F., Saraiva, R. M., Mizubuti, E. S. G., Romeiro, R. S., and Maffia, L. A. (2014). Isolation and selection of Hemileia Vastatrix antagonists. European Journal of Plant Pathology 139, 763–772. doi:10.1007/s10658-014-0430-9.
83	Hakil, M., Denis, S., Viniegra-González, G., and Augur, C. (1998). Degradation and Product Analysis of Caffeine and Related Dimethylxanthines by Filamentous Fungi. Enzyme and Microbial Technology 22, 355–359. doi:10.1016/S0141-0229(97)00205-6.
84	Halimah, D., Munif, A., and Giyanto, G. (2015). Effectiveness of Endophytic Bacterial Consortium of Coffee Plant on Mortality of Pratylenchus Coffeae in Vitro. Pelita Perkebunan 31, 175–185. doi:10.22302/iccri.jur.pelitaperkebunan.v31i3.205.
85	Hoang, H., Tran, L. H., Nguyen, T. H., Nguyen, D. A. T., Nguyen, H. H. T., Pham, N. B., et al. (2020). Occurrence of endophytic bacteria in Vietnamese Robusta coffee roots and their effects on plant parasitic nematodes. Symbiosis 80, 75–84. doi:10.1007/s13199-019-00649-9.
86	Holzapfel, W., and Müller, G. (2007). “KaffeeLebensmittel pflanzlicher Herkunft, Behr’s Verlag, Hamburg, Germany, pp. 457–467.,” in Holzapfel, W. H. (Ed.), Lebensmittel pflanzlicher Herkunft (Hamburg, Germany), 457–467.
87	Iamanaka, B. T., Teixeira, A. A., Teixeira, A. R. R., Copetti, M. V., Bragagnolo, N., and Taniwaki, M. H. (2014). The mycobiota of coffee beans and its influence on the coffee beverage. Food Research International 62, 353–358. doi:10.1016/j.foodres.2014.02.033.
88	Ilic, Z., Bui, T., Tran-Dinh, N., Dang, M. H. V., Kennedy, I., and Carter, D. (2007). Survey of Vietnamese coffee beans for the presence of ochratoxigenic Aspergilli. Mycopathologia 163, 177–182. doi:10.1007/s11046-007-0099-0.
89	James, T. Y., Marino, J. A., Perfecto, I., and Vandermeer, J. (2016). Identification of Putative Coffee Rust Mycoparasites via Single-Molecule DNA Sequencing of Infected Pustules. Applied and Environmental Microbiology 82, 631–639. doi:10.1128/AEM.02639-15.
90	Jimenez-Salgado, T., Fuentes-Ramirez, L. E., Tapia-Hernandez, A., Mascarua-Esparza, M. A., Martinez-Romero, E., and Caballero-Mellado, J. (1997). Coffea arabica L., a New Host Plant for Acetobacter diazotrophicus, and Isolation of Other Nitrogen-Fixing Acetobacteria. Applied and Environmental Microbiology 63, 3676–3683.
91	Joosten, H. M. L. J., Goetz, J., Pittet, A., Schellenberg, M., and Bucheli, P. (2001). Production of ochratoxin A by Aspergillus carbonarius on coffee cherries. International Journal of Food Microbiology 65, 39–44. doi:10.1016/S0168-1605(00)00506-7.
92	Kejela, T., Thakkar, V. R., and Thakor, P. (2016). Bacillus species (BT42) isolated from Coffea arabica L. rhizosphere antagonizes Colletotrichum gloeosporioides and Fusarium oxysporum and also exhibits multiple plant growth promoting activity. BMC Microbiology 16. doi:10.1186/s12866-016-0897-y.
93	Kouadio, A. I., Agbo, N. G., Lebrihi, A., Mathieu, F., and Dosso, M. (2006). Effect of the frequency of the mixing of coffee cherries put out for drying on the kinetics of drying and the relationship to ochratoxin A production. Food Additives and Contaminants 23, 295–304. doi:10.1080/02652030500469055.
94	Kouadio, I. A., Koffi, L. B., Nemlin, J. G., and Dosso, M. B. (2012). Effect of Robusta (Coffea canephora P.) coffee cherries quantity put out for sun drying on contamination by fungi and Ochratoxin A (OTA) under tropical humid zone (Côte d‘Ivoire). Food and Chemical Toxicology 50, 1969–1979. doi:10.1016/j.fct.2012.03.042.
95	Lakshmipathy, R., Balakrishna, A. N., and Bagyaraj, D. J. (2012). Abundance and diversity of AM Fungi across a gradient of land use intensity and their seasonal variations in Niligiri biosphere of the Western Ghats, India. Journal of Agricultural Science and Technology 14, 903–918.
96	Lamelas, A., Desgarennes, D., López-Lima, D., Villain, L., Alonso-Sánchez, A., Artacho, A., et al. (2020). The Bacterial Microbiome of Meloidogyne-Based Disease Complex in Coffee and Tomato. Frontiers in Plant Science 11. doi:10.3389/fpls.2020.00136.
97	Lebrón, L., Lodge, D. J., and Bayman, P. (2012). Differences in Arbuscular Mycorrhizal Fungi among Three Coffee Cultivars in Puerto Rico. ISRN Agronomy 2012, 1–7. doi:10.5402/2012/148042.
98	Leong, K., Chen, Y., Pan, S., Chen, J., Wu, H., Chang, Y., et al. (2014). Diversity of Lactic Acid Bacteria Associated with Fresh Coffee Cherries in Taiwan. Current Microbiology 68, 440–447. doi:10.1007/s00284-013-0495-2.
99	Leong, S. L., Hien, L. T., An, T. V., Trang, N. T., Hocking, A. D., and Scott, E. S. (2007). Ochratoxin A-producing Aspergilli in Vietnamese green coffee beans. Letters in Applied Microbiology 45, 301–306. doi:10.1111/j.1472-765X.2007.02189.x.
100	Liardon, R., Braendlin, N., and Spadone, J. C. (1992). Biogenesis of Rio flavour impact compound: 2,4,6-trichloroanisole. in (San Francisco, CA.).
101	Lopes, E. S., Oliveira, E., Dias, R., and Schenck, N. C. (1983). Occurence and distribution of Vesicular-Arbuscular Mycorrhizal fungi in coffee (Coffea arabica L.) in central Sao Paulo state, Brazil. Turrialba 33, 417–422.
102	Ludlow, C. L., Cromie, G. A., Garmendia-Torres, C., Sirr, A., Hays, M., Field, C., et al. (2016). Independent Origins of Yeast Associated with Coffee and Cacao Fermentation. Current Biology 26, 965–971. doi:10.1016/j.cub.2016.02.012.
103	Magnani, M., Fernandes, T., Prete, C. E. C., Homechim, M., Ono, E. Y. S., Vilas-Boas, L. A., et al. (2005). Molecular identification of Aspergillus spp. isolated from coffee beans. Scientia Agricola 62, 45–49. doi:10.1590/S0103-90162005000100009.
104	Mahdhi, M., Tounekti, T., Al-Turki, T. A., and Khemira, H. (2017). Composition of the root mycorrhizal community associated with Coffea arabica in Fifa Mountains (Jazan region, Saudi Arabia). Journal of Basic Microbiology 57, 691–698. doi:10.1002/jobm.201700075.
105	Martinez, S. J., Bressani, A. P. P., Dias, D. R., Simão, J. B. P., and Schwan, R. F. (2019). Effect of Bacterial and Yeast Starters on the Formation of Volatile and Organic Acid Compounds in Coffee Beans and Selection of Flavors Markers Precursors During Wet Fermentation. Frontiers in Microbiology 10. doi:10.3389/fmicb.2019.01287.
106	Martinez, S. J., Bressani, A. P. P., Miguel, M. G. da C. P., Dias, D. R., and Schwan, R. F. (2017). Different inoculation methods for semi-dry processed coffee using yeasts as starter cultures. Food Research International 102, 333–340. doi:10.1016/j.foodres.2017.09.096.
107	Martins, M. L., Martins, H. M., and Gimeno, A. (2003). Incidence of microflora and of ochratoxin A in green coffee beans (Coffea arabica). Food Additives & Contaminants 20, 1127–1131. doi:10.1080/02652030310001620405.
108	Martins, P. M. M., Batista, N. N., Miguel, M. G. da C. P., Simão, J. B. P., Soares, J. R., and Schwan, R. F. (2020). Coffee growing altitude influences the microbiota, chemical compounds and the quality of fermented coffees. Food Research International 129, 108872. doi:10.1016/j.foodres.2019.108872.
109	Masoud, W., Bjørg Cesar, L., Jespersen, L., and Jakobsen, M. (2004). Yeast involved in fermentation of Coffea arabica in East Africa determined by genotyping and by direct denaturating gradient gel electrophoresis. Yeast 21, 549–556. doi:10.1002/yea.1124.
110	Masoud, W., and Jespersen, L. (2006). Pectin degrading enzymes in yeasts involved in fermentation of >i>Coffea arabica</i> in East Africa. International Journal of Food Microbiology 110, 291–296. doi:10.1016/j.ijfoodmicro.2006.04.030.
111	Masoud, W., and Kaltoft, C. H. (2006). The effects of yeasts involved in the fermentation of Coffea arabica in East Africa on growth and ochratoxin A (OTA) production by Aspergillus ochraceus. International Journal of Food Microbiology 106, 229–234. doi:10.1016/j.ijfoodmicro.2005.06.015.
112	Masoud, W., Poll, L., and Jakobsen, M. (2005). Influence of volatile compounds produced by yeasts predominant during processing of Coffea arabica in East Africa on growth and ochratoxin A (OTA) production by Aspergillus ochraceus. Yeast 22, 1133–1142. doi:10.1002/yea.1304.
113	Massawe, G. A., and Lifa, S. J. (2010). Yeasts and lactic acid bacteria coffee fermentation starter cultures. International Journal of Postharvest Technology and Innovation 2, 41. doi:10.1504/IJPTI.2010.038187.
114	Mazzafera, P., Olsson, O., and Sandberg, G. (1996). Degradation of caffeine and related methylxanthines by Serratia marcescens isolated from soil under coffee cultivation. Microbial Ecology 31. doi:10.1007/BF00167865.
115	Medina, A. D., López, J. A., Pérez, C. S., Albelo, N., and Reboso, A. G. (2003). Efecto de la aplicación de Azotobacter chroococcum y bacterias solubilizadoras de fósforo sobre el desarrollo de posturas de cafeto (Coffea arabica L.). Centro Agricola 30, 94–95.
116	Mekete, T., Hallmann, J., Kiewnick, S., and Sikora, R. (2009). Endophytic bacteria from Ethiopian coffee plants and their potential to antagonise Meloidogyne incognita. Nematology 11, 117–127. doi:10.1163/156854108X398462.
117	Miguel, P. S. B., Delvaux, J. C., de Oliveira, M. N. V., Monteiro, L. C. P., de Souza Freitas, F., Tótola, M. D. C., et al. (2013). Diversity of endophytic bacteria in the fruits of Coffea canephora. African Journal of Microbiology Research 7, 586–594. doi:10.5897/AJMR12.2036.
118	Mislivec, P. B., Bruce, V. R., and Gibson, R. (1983). Incidence of Toxigenic and Other Molds in Green Coffee Beans. Journal of Food Protection 46, 969–973. doi:10.4315/0362-028X-46.11.969.
119	Monroy, S. H., Brindis, R. C., Moreno, J. P., and Velarde, E. V. (2019). Diversidad endomicorrícica en plantas de café (Coffea arabica L.) infestadas con roya (Hemileia vastatrix). Nova Scientia 11, 102. doi:10.21640/ns.v11i22.1642.
120	Monteiro, M. C. P., Alves, N. M., Queiroz, M. V. de, Pinho, D. B., Pereira, O. L., Souza, S. M. C. de, et al. (2017). Antimicrobial activity of endophytic fungi from coffee plants. Bioscience Journal, 381–389. doi:10.14393/BJ-v33n2-34494.
121	Mulaw, T. B., Kubicek, C. P., and Druzhinina, I. S. (2010). The Rhizosphere of Coffea Arabica in Its Native Highland Forests of Ethiopia Provides a Niche for a Distinguished Diversity of Trichoderma. Diversity 2, 527–549. doi:10.3390/d2040527.
122	Mulaw, T., Druzhinina, I., Kubicek, C., and Atanasova, L. (2013). Novel Endophytic Trichoderma spp. Isolated from Healthy Coffea arabica Roots are Capable of Controlling Coffee Tracheomycosis. Diversity 5, 750–766. doi:10.3390/d5040750.
123	Muleta, D., Assefa, F., Börjesson, E., and Granhall, U. (2013). Phosphate-solubilising rhizobacteria associated with Coffea arabica L. in natural coffee forests of southwestern Ethiopia. Journal of the Saudi Society of Agricultural Sciences 12, 73–84. doi:10.1016/j.jssas.2012.07.002.
124	Muleta, D., Assefa, F., and Granhall, U. (2007a). In vitro Antagonism of Rhizobacteria Isolated from Coffea arabica L. against Emerging Fungal Coffee Pathogens. Engineering in Life Sciences 7, 577–586. doi:10.1002/elsc.200700004.
125	Muleta, D., Assefa, F., Hjort, K., Roos, S., and Granhall, U. (2009). Characterization of Rhizobacteria Isolated from Wild Coffea arabica L. Engineering in Life Sciences 9, 100–108. doi:10.1002/elsc.200700031.
126	Muleta, D., Assefa, F., Nemomissa, S., and Granhall, U. (2007b). Composition of coffee shade tree species and density of indigenous arbuscular mycorrhizal fungi (AMF) spores in Bonga natural coffee forest, southwestern Ethiopia. Forest Ecology and Management 241, 145–154. doi:10.1016/j.foreco.2007.01.021.
127	Muleta, D., Assefa, F., Nemomissa, S., and Granhall, U. (2008). Distribution of arbuscular mycorrhizal fungi spores in soils of smallholder agroforestry and monocultural coffee systems in southwestern Ethiopia. Biology and Fertility of Soils 44, 653–659. doi:10.1007/s00374-007-0261-3.
128	Murthy, P. S., and Naidu, M. M. (2012). Production and Application of Xylanase from Penicillium sp. Utilizing Coffee By-products. Food and Bioprocess Technology 5, 657–664. doi:10.1007/s11947-010-0331-7.
129	Murthy, P. S., Naidu, M. M., and Srinivas, P. (2009). Production of α-amylase under solid-state fermentation utilizing coffee waste. Journal of Chemical Technology & Biotechnology 84, 1246–1249.
130	Muynarsk, E. S. M., de Melo Pereira, G. V., Mesa, D., Thomaz-Soccol, V., Carvalho, J. C., Pagnoncelli, M. G. B., et al. (2019). Draft Genome Sequence of Pediococcus acidilactici Strain LPBC161, Isolated from Mature Coffee Cherries during Natural Fermentation. Microbiology Resource Announcements 8. doi:10.1128/MRA.00332-19.
131	Nair, J. R., Singh, G., and Sekar, V. (2002). Isolation and characterization of a novel Bacillus strain from coffee phyllosphere showing antifungal activity. Journal of Applied Microbiology 93, 772–780. doi:10.1046/j.1365-2672.2002.01756.x.
132	Nakajima, M., Tsubouchi, H., Miyabe, M., and Ueno, Y. (1997). Survey of aflatoxin B 1 and ochratoxin A in commercial green coffee beans by high‐performance liquid chromatography linked with immunoaffinity chromatography. Food and Agricultural Immunology 9, 77–83. doi:10.1080/09540109709354938.
133	Nasanit, R., and Satayawut, K. (2015). Microbiological study during coffee fermentation of Coffea arabica var. chiangmai 80 in Thailand. Kasetsart Journal 49, 32–41.
134	Nayak, S., Harshitha, M. J., Sampath, C., Anilkumar, H. S., and Rao, C. V. (2012). Isolation and characterization of caffeine degrading bacteria from coffee pulp. Indian Journal of Biotechnology, 86–91.
135	Ndayambaje, J. B., Nsabimana, A., Dushime, S., Ishimwe, F., Janvier, H., and Ongol, M. P. (2019). Microbial identification of potato taste defect from coffee beans. Food Science & Nutrition 7, 287–292. doi:10.1002/fsn3.887.
136	Nganou, N., Durand, N., Tatsadjieu, N. L., Métayer, I., Montet, D., and Mbofung, C. M. F. (2014). Fungal Flora and Ochratoxin A Associated with Coffee in Cameroon. British Microbiology Research Journal 4, 1–17. doi:10.9734/BMRJ/2014/4284.
137	Noonim, P., Mahakarnchanakul, W., Nielsen, K. F., Frisvad, J. C., and Samson, R. A. (2008a). Isolation, identification and toxigenic potential of ochratoxin A-producing Aspergillus species from coffee beans grown in two regions of Thailand. International Journal of Food Microbiology 128, 197–202. doi:10.1016/j.ijfoodmicro.2008.08.005.
138	Noonim, P., Mahakarnchanakul, W., Varga, J., Frisvad, J. C., and Samson, R. A. (2008b). Two novel species of Aspergillus section Nigri from Thai coffee beans. International Journal of Systematic and Evolutionary Microbiology 58, 1727–1734. doi:10.1099/ijs.0.65694-0.
139	Novais, C. B. de, Souza, F. A. de, and Siqueira, J. O. (2010). Caracterização fenotípica e molecular de esporos de fungos micorrízicos arbusculares mantidos em banco de germoplasma. Pesquisa Agropecuária Brasileira 45, 886–896. doi:10.1590/S0100-204X2010000800015.
140	Nunes, F. V., and de Melo, I. S. (2006). Isolation and characterization of endophytic bacteria of coffee plants and their potential in caffeine degradation. Environmental Toxicology 1, 293–297. doi:10.2495/ETOX060291.
141	Oliveira, M. N. V., Santos, T. M. A., Vale, H. M. M., Delvaux, J. C., Cordero, A. P., Ferreira, A. B., et al. (2013). Endophytic microbial diversity in coffee cherries of Coffea arabica from southeastern Brazil. Canadian Journal of Microbiology 59, 221–230. doi:10.1139/cjm-2012-0674.
142	Oliveira, R., Souza, R., Lima, T., and Cavalcanti, M. (2014). Endophytic fungal diversity in coffee leaves (Coffea arabica) cultivated using organic and conventional crop management systems. Mycosphere 5, 523–530. doi:10.5943/mycosphere/5/4/4.
143	Osorio, N. W., Alzate, J. M., and Ramírez, G. A. (2002). Coffee seedling growth as affected by mycorrhizal inoculation and organic amendment. Communications in Soil Science and Plant Analysis 33, 1425–1434. doi:10.1081/CSS-120004291.
144	Oumer, O. J., and Abate, D. (2018). Screening and Molecular Identification of Pectinase Producing Microbes from Coffee Pulp. BioMed Research International 2018, 1–7. doi:10.1155/2018/2961767.
145	Pagnoncelli, M. G. B., Brand, D., Roussos, S., Gaimeperraud, I., Augur, C., and Soccol, C. R. (2003). “Isolation and Identification of Lactic Acid Bacteria from Mature Coffee Cheries: Potential Application in Coffee Husk Ensiling,” in New Horizons in Biotechnology, eds. S. Roussos, C. R. Soccol, A. Pandey, and C. Augur (Dordrecht: Springer Netherlands), 321–333. doi:10.1007/978-94-017-0203-4_29.
146	Pardo, E., Marin, S., Ramos, A. J., and Sanchis, V. (2004). Occurrence of Ochratoxigenic Fungi and Ochratoxin A in Green Coffee from Different Origins. Food Science and Technology International 10, 45–49. doi:10.1177/1082013204041509.
147	Pardo, E., Marín, S., Ramos, A. J., and Sanchis, V. (2005). Effect of Water Activity and Temperature on Mycelial Growth and Ochratoxin A Production by Isolates of Aspergillus ochraceus on Irradiated Green Coffee Beans. Journal of Food Protection 68, 133–138. doi:10.4315/0362-028X-68.1.133.
148	Pasin, L. A. A. P., Abreu, M. S. de, and Souza, I. P. (2011). Influence of the fungi population on the physicochemical and chemical composition of coffee (Coffea arabica L.). Food Science and Technology (Campinas) 31, 681–687. doi:10.1590/S0101-20612011000300020.
149	Pasin, L. A. A. P., Almeida, J. R. de, and Abreu, M. S. de (2009). Fungos associados a grãos de cinco cultivares de café (Coffea arabica L.). Acta Botanica Brasilica 23, 1129–1132. doi:10.1590/S0102-33062009000400022.
150	Pederson, C. S., and Breed, R. S. (1946). Fermentation of coffee. Journal of Food Science 11, 99–106. doi:10.1111/j.1365-2621.1946.tb16331.x.
151	Pereira, R. T. G., Pfenning, L. H., and de Castro, H. A. (2005). Cladosporium cladosporioides (Fresen.) de vries em frutos do cafeeiro (Coffea arabica L.). Ciênc. agrotec. 29, 5.
152	Pérez, A., Bustamante, C., Rodríguez, R., Díaz, A., and Bertot, Y. (2002). Influencia de diferentes variantes de fertilización en el crecimiento y desarrollo de posturas de Coffea canephora Pierre. Cultivos Tropicales 23, 89–93.
153	Peterson, S. W., Vega, F. E., Posada, F., and Nagai, C. (2005). Penicillium coffeae, a new endophytic species isolated from a coffee plant and its phylogenetic relationship to P. fellutanum, P. thiersii and P. brocae based on parsimony analysis of multilocus DNA sequences. Mycologia 97, 659–666.
154	Pimenta, C. J., and Vilela, E. R. (2003). Composição microbiana e ocratoxina a no café (Coffea arabica L.) submetido a diferentes tempos de espera antes da secagem. Ciência e Agrotecnologia 27, 1315–1320. doi:10.1590/S1413-70542003000600016.
155	Pires, J. F., Cardoso, L. de S., Schwan, R. F., and Silva, C. F. (2017). Diversity of microbiota found in coffee processing wastewater treatment plant. World Journal of Microbiology and Biotechnology 33, 12. doi:10.1007/s11274-017-2372-9.
156	Posada, F., Aime, M. C., Peterson, S. W., Rehner, S. A., and Vega, F. E. (2007). Inoculation of coffee plants with the fungal entomopathogen Beauveria bassiana (Ascomycota: Hypocreales). Mycological Research 111, 748–757. doi:10.1016/j.mycres.2007.03.006.
157	Posada, F., and Vega, F. E. (2006). Inoculation and colonization of coffee seedlings (Coffea arabica L.) with the fungal entomopathogen Beauveria bassiana (Ascomycota: Hypocreales). Mycoscience 47, 284–289. doi:10.1007/S10267-006-0308-6.
158	Posada, R. H., de Prager, M. S., Sieverding, E., Dorantes, K. A., and Heredia-Abarca, G. P. (2012). Relaciones entre los hongos filamentosos y solubilizadores de fosfatos con algunas variables edáficas y el manejo de cafetales. Revista de Biología Tropical 60. doi:10.15517/rbt.v60i3.1759.
159	Posada, R. H., Heredia-Abarca, G., Sieverding, E., and Sánchez de Prager, M. (2013). Solubilization of iron and calcium phosphates by soil fungi isolated from coffee plantations. Archives of Agronomy and Soil Science 59, 185–196. doi:10.1080/03650340.2011.610030.
160	Posada, R. H., Sánchez de Prager, M., Heredia-Abarca, G., and Sieverding, E. (2018). Effects of soil physical and chemical parameters, and farm management practices on arbuscular mycorrhizal fungi communities and diversities in coffee plantations in Colombia and Mexico. Agroforestry Systems, 555–574. doi:10.1007/s10457-016-0030-0.
161	Prates Júnior, P., Moreira, B. C., da Silva, M. de C. S., Veloso, T. G. R., Stürmer, S. L., Fernandes, R. B. A., et al. (2019). Agroecological coffee management increases arbuscular mycorrhizal fungi diversity. PLOS ONE 14, e0209093. doi:10.1371/journal.pone.0209093.
162	Quyen, D. H., Phung, P. H. P., and Xo (2017). Arbuscular mycorrhizal fungi association in two coffee farms with different cultivation at Lam Dong. Vietnam Journal of Science and Technology 55, 1–7. doi:10.15625/2525-2518/55/1A/12376.
163	Rajeshkumar, S., and Nisha, M. C. (2019). Studies on association of Arbuscular Mycorrhizal Fungi in coffee of Nilgiri district, Tamilnadu, India. Journal of Emerging Technologies and Innovative Research 6, 35–45.
164	Ranjini, A. P., and Raja, N. (2019). Efficacy of biocontrol agents on Myrothecium roridum, the stem necrosis and leaf spot pathogen of coffee seedlings. Journal of Biopesticides 12, 109–113.
165	Raviraja, N. S., Sridhar, K. R., and Bärlocher, F. (1996). Endophytic aquatic hyphomycetes of roots of plantation crops and ferns from India. Sydowia 48, 152–160.
166	Rezende, E. de F., Borges, J. G., Cirillo, M. Â., Prado, G., Paiva, L. C., and Batista, L. R. (2013). Ochratoxigenic fungi associated with green coffee beans (Coffea arabica L.) in conventional and organic cultivation in Brazil. Brazilian Journal of Microbiology 44, 377–384. doi:10.1590/S1517-83822013000200006.
167	Rodarte, M. P., Dias, D. R., Vilela, D. M., and Schwan, R. F. (2011). Proteolytic activities of bacteria, yeasts and filamentous fungi isolated from coffee fruit (Coffea arabica L.). Acta Scientiarum. Agronomy 33. doi:10.4025/actasciagron.v33i3.6734.
168	Rodríguez, A. C.-, Calzada, R. T.-, Peña, C. G.-D. la, Ávila, J. G. A.-, Reyna, E. N.-, Paniagua, F. V.-, et al. (2020). A metagenomic approach in the evaluation of the soil microbiome in coffee plantations under organic and conventional production in tropical agroecosystems. Emirates Journal of Food and Agriculture, 263. doi:10.9755/ejfa.2020.v32.i4.2092.
169	Roussos, S., Aquiahuatl, M. A., Cassaigne, J., Favela, E., Gutierrez, M., Hannibal, L., et al. (1989). Detoxificacion De La Pulpa De Cafe Por Fermentacion Solida. in (Proceedings of the First Seminario Internacional sobre Biotecnologia en la Agroindustria Cafetelera. Xalapa, Veracruz, Mexico, 1989. p.), 121–143.
170	Roussos, S., Aquiahuatl, M. A., Trejo-Hernandez, M. R., Perraud, I. G., Favela, E., Ramakrishna, M., et al. (1995). Biotechnological management of coffee pulp - isolation, screening, characterization, selection of caffeine-degrading fungi and natural microflora present in coffee pulp and husk. Applied Microbiology and Biotechnology 42, 756–762.
171	Sakiyama, C. C. H., Paula, E. M., Pereira, P. C., Borges, A. C., and Silva, D. O. (2001). Characterization of pectin lyase produced by an endophytic strain isolated from coffee cherries. Letters in Applied Microbiology 33, 117–121. doi:10.1046/j.1472-765x.2001.00961.x.
172	Samson, R. A., Houbraken, J. A. M. P., Kuijpers, A. F. A., Frank, J. M., and Frisvad, J. C. (2004). New ochratoxin A or sclerotium producing species in Aspergillus section Nigri. Studies in Mycology 50, 45–61.
173	Santamaría, J., and Bayman, P. (2005). Fungal Epiphytes and Endophytes of Coffee Leaves (Coffea arabica). Microbial Ecology 50, 1–8. doi:10.1007/s00248-004-0002-1.
174	Saucedo-Garcia, A., Anaya, A. L., Espinosa-Garcia, F. J., and Gonzalez, M. C. (2014). Diversity and Communities of Foliar Endophytic Fungi from Different Agroecosystems of Coffea arabica L. in Two Regions of Veracruz, Mexico. PLOS ONE 9.
175	Schillinger, U., Boehringer, B., Wallbaum, S., Caroline, L., Gonfa, A., Huch, M., et al. (2008). A genus-specific PCR method for differentiation between Leuconostoc and Weissella and its application in identification of heterofermentative lactic acid bacteria from coffee fermentation. FEMS Microbiology Letters 286, 222–226. doi:10.1111/j.1574-6968.2008.01286.x.
176	Serrat, M., Bermúdez, R. C., and Villa, T. G. (2002). Production, Purification, and Characterization of a Polygalacturonase from a New Strain of Kluyveromyces marxianus Isolated from Coffee Wet-Processing Wastewater. Applied Biochemistry and Biotechnology 97, 193–208. doi:10.1385/ABAB:97:3:193.
177	Sette, L. D., Passarini, M. R. Z., Delarmelina, C., Salati, F., and Duarte, M. C. T. (2006). Molecular characterization and antimicrobial activity of endophytic fungi from coffee plants. World Journal of Microbiology and Biotechnology 22, 1185–1195. doi:10.1007/s11274-006-9160-2.
178	Sewnet, T. C., and Tuju, F. A. (2013). Arbuscular mycorrhizal fungi associated with shade trees and Coffea arabica L. in a coffee-based agroforestry system in Bonga, Southwestern Ethiopia. Afrika Focus 26. doi:10.21825/af.v26i2.4912.
179	Shiomi, H. F., Silva, H. S. A., Melo, I. S. de, Nunes, F. V., and Bettiol, W. (2006). Bioprospecting endophytic bacteria for biological control of coffee leaf rust. Scientia Agricola 63, 32–39. doi:10.1590/S0103-90162006000100006.
180	Silva, C. F. (2014). “Microbial activity during coffee fermentation,” in Cocoa and Coffee Fermentations Fermented Foods and Beverages Series. (Taylor & Francis Group).
181	Silva, C. F., Batista, L., Abreu, L., Dias, E., and Schwan, R. (2008a). Succession of bacterial and fungal communities during natural coffee (Coffea arabica) fermentation. Food Microbiology 25, 951–957. doi:10.1016/j.fm.2008.07.003.
182	Silva, C. F., Batista, L. R., and Schwan, R. F. (2008b). Incidence and distribution of filamentous fungi during fermentation, drying and storage of coffee (Coffea arabica L.) beans. Brazilian Journal of Microbiology 39, 521–526. doi:10.1590/S1517-83822008000300022.
183	Silva, C. F., Schwan, R. F., Sousa Dias, Ë., and Wheals, A. E. (2000). Microbial diversity during maturation and natural processing of coffee cherries of Coffea arabica in Brazil. International Journal of Food Microbiology 60, 251–260. doi:10.1016/S0168-1605(00)00315-9.
184	Silva, C. F., Vilela, D. M., de Souza Cordeiro, C., Duarte, W. F., Dias, D. R., and Schwan, R. F. (2013). Evaluation of a potential starter culture for enhance quality of coffee fermentation. World Journal of Microbiology and Biotechnology 29, 235–247. doi:10.1007/s11274-012-1175-2.
185	Silva, H. S. A., Terrasan, C. R. F., Tozzi, J. P. L., Melo, I. S., and Bettiol, W. (2008c). Bacterias endofitas do cafeeiro e a inducao de enzimas relacionadas com o controle da ferrugem (Hemileia vastatrix). Tropical Plant Pathology 33, 49–54.
186	Silva, H. S. A., Tozzi, J. P. L., Terrasan, C. R. F., and Bettiol, W. (2012). Endophytic microorganisms from coffee tissues as plant growth promoters and biocontrol agents of coffee leaf rust. Biological Control 63, 62–67. doi:10.1016/j.biocontrol.2012.06.005.
187	Siqueira, J. O., Colozzi Filho, A., Saggin Júnior, O. J., Guimarães, P. T. G., and Oliveira, E. (1993). Crescimento de mudas e produção do cafeeiro sob influência de fungos micorrízicos e superfosfato. Revista Brasileira de Ciência do Solo 17, 53–60.
188	Siqueira, J. O., Colozzi-Filho, A., De Oliveira, E., Fernandes, A. B., and Florence, M. L. (1987). Micorrizas vesicular-arbusculares em mudas de cafeeiro produzidas no sul do estado de Minas Gerais. Pesquisa Agropecuária Brasileira 22, 31–38.
189	Siqueira, J. O., Saggin Junior, O. J., Colozzi-Filho, A., and De Oliveira, E. (1995). Influencia do substrato de formacao e da micorriza no crescimento de mudas de cafeeiro transplantadas. Pesquisa Agropecuária Brasileira 30, 1417–1425.
190	Siqueira, J. O., Saggin-Júnior, O. J., Flores-Aylas, W. W., and Guimarães, P. T. G. (1998). Arbuscular mycorrhizal inoculation and superphosphate application influence plant development and yield of coffee in Brazil. Mycorrhiza 7, 293–300. doi:10.1007/s005720050195.
191	Suarez-Quiroz, M., Gonzalez-Rios, O., Barel, M., Guyot, B., Schorr-Galindo, S., and Guiraud, J.-P. (2004). Study of ochratoxin A-producing strains in coffee processing. International Journal of Food Science and Technology 39, 501–507. doi:10.1111/j.1365-2621.2004.00810.x.
192	Suarez-Quiroz, M., Gonzalez-Rios, O., Barel, M., Guyot, B., Schorr-Galindo, S., and Guiraud, J.-P. (2005). Effect of the post-harvest processing procedure on OTA occurrence in artificially contaminated coffee. International Journal of Food Microbiology 103, 339–345. doi:10.1016/j.ijfoodmicro.2004.11.044.
193	Sumitha, J., and Sivakumar, T. (2013). Isolation and characterization of caffeine degrading bacteria from West Karnataka, India. International Journal of Current Microbiology and Applied Sciences 2, 338–346.
194	Taniwaki, M. H., Pitt, J. I., Teixeira, A. A., and Iamanaka, B. T. (2003). The source of ochratoxin A in Brazilian coffee and its formation in relation to processing methods. International Journal of Food Microbiology 82, 173–179. doi:10.1016/S0168-1605(02)00310-0.
195	Tauk, S. M. (1986). Estudo decomposiçao da polpa de café a 45°C atraves do uso de microorganismos isolados da polpa. Turrialba 136, 271–280.
196	Teshome, B., Wassie, M., and Abatneh, E. (2017). Isolation, Screening and Biochemical Characterization of Phosphate Solubilizing Rhizobacteria Associated with Coffea arabica L. Journal of Fertilizers & Pesticides 08. doi:10.4172/2471-2728.1000188.
197	Tharappan, B., and Ahmad, R. (2006). Fungal colonization and biochemical changes in coffee beans undergoing monsooning. Food Chemistry 94, 247–252. doi:10.1016/j.foodchem.2004.11.016.
198	Theodoro, V. C. de A., Alvarenga, M. I. N., Guimarães, R. J., and Mourão Júnior, M. (2003). Carbono da biomassa microbiana e micorriza em solo sob mata nativa e agroecossistemas cafeeiros. Acta Scientiarum. Agronomy 25. doi:10.4025/actasciagron.v25i1.2468.
199	Thom, C., and Church, M. B. (1926). The Aspergilli. Baltimore, Maryland: Williams & Wilkins.
200	Tiru, M., Muleta, D., Berecha, G., and Adugna, G. (2013). Antagonistic Effects of Rhizobacteria Against Coffee Wilt Disease Caused by Gibberella xylarioides. Asian Journal of Plant Pathology 7, 109–122.
201	Trejo, D., Ferrera-Cerrato, R., García, R., Varela, L., Lara, L., and Alarcón, A. (2011). Efectividad de siete consorcios nativos de hongos micorrízicos arbusculares en plantas de café en condiciones de invernadero y campo. Revista chilena de historia natural 84, 23–31. doi:10.4067/S0716-078X2011000100002.
202	Urbano, G. R., Taniwaki, M. H., de F. LEITÃO, M. F., and Vicentini, M. C. (2001). Occurrence of Ochratoxin A–Producing Fungi in Raw Brazilian Coffee. Journal of Food Protection 64, 1226–1230. doi:10.4315/0362-028X-64.8.1226.
203	Van Pee, W., and Castelein, J. (1971). The Yeast Flora of Fermenting Robusta Coffee. East African Agricultural and Forestry Journal 36, 308–310. doi:10.1080/00128325.1971.11662476.
204	Van Pee, W., and Castelein, J. M. (1972). Study of the pectinolytic microflora, particularly the Enterobacteriaceae, from fermenting coffee in the Congo. Journal of Food Science 37, 171–174. doi:10.1111/j.1365-2621.1972.tb03412.x.
205	Varela, L., and Trejo, D. (2001). Los hongos micorrizógenos arbusculares como componentes de la biodiversidad del suelo en México. Acta Zoológica Mexicana (nueva serie), 39–51.
206	Vaughn, R. H., Camargo, R. D. E., Fallange, H., Mello Ayres, G., and Sergedello, A. (1958). Observations on the microbiology of the coffee fermentation in Brazil. Food Technology 12.
207	Vega, F. E., Pava-Ripoll, M., Posada, F., and Buyer, J. S. (2005). Endophytic bacteria in Coffea arabica L. Journal of Basic Microbiology 45, 371–380. doi:10.1002/jobm.200410551.
208	Vega, F. E., Posada, F., Aime, M. C., Peterson, S. W., and Rehner, S. A. (2008a). Fungal endophytes in green coffee seeds. Mycosystema 27, 75–84.
209	Vega, F. E., Posada, F., Catherine Aime, M., Pava-Ripoll, M., Infante, F., and Rehner, S. A. (2008b). Entomopathogenic fungal endophytes. Biological Control 46, 72–82. doi:10.1016/j.biocontrol.2008.01.008.
210	Vega, F. E., Posada, F., Peterson, S. W., Gianfagna, T. J., and Chaves, F. (2006). Penicillium species endophytic in coffee plants and ochratoxin A production. Mycologia 98, 31–42.
211	Vega, F. E., Simpkins, A., Aime, M. C., Posada, F., Peterson, S. W., Rehner, S. A., et al. (2010). Fungal endophyte diversity in coffee plants from Colombia, Hawai’i, Mexico and Puerto Rico. Fungal Ecology 3, 122–138. doi:10.1016/j.funeco.2009.07.002.
212	Vélez, P. E., and Rosillo, A. G. (1995). Evaluación del antagonismo del hongo Verticillium lecanii sobre Hemileia vastatrix en condiciones de invernadero y de campo. Cenicafé 46, 45–55.
213	Velmourougane, K. (2013). Impact of Natural Fermentation on Physicochemical, Microbiological and Cup Quality Characteristics of Arabica and Robusta Coffee. Proceedings of the National Academy of Sciences, India Section B: Biological Sciences 83, 233–239. doi:10.1007/s40011-012-0130-1.
214	Velmourougane, K. (2017). Shade Trees Improve Soil Biological and Microbial Diversity in Coffee Based System in Western Ghats of India. Proceedings of the National Academy of Sciences, India Section B: Biological Sciences 87, 489–497. doi:10.1007/s40011-015-0598-6.
215	Velmourougane, K., Bhat, R., and Gopinandhan, T. N. (2010). Impact of Drying Surface and Raking Frequencies on Mold Incidence, Ochratoxin A Contamination, and Cup Quality During Preparation of Arabica and Robusta Cherries at the Farm Level. Foodborne Pathogens and Disease 7, 1435–1440. doi:10.1089/fpd.2010.0575.
216	Velmourougane, K., Bhat, R., Gopinandhan, T. N., and Panneerselvam, P. (2011). Impact of delay in processing on mold development, ochratoxin-A and cup quality in arabica and robusta coffee. World Journal of Microbiology and Biotechnology 27, 1809–1816. doi:10.1007/s11274-010-0639-5.
217	Velmourougane, K., Panneerselvam, P., and Alwar, R. P. A. (2000). Qualitative and quantitative distribution of microfiora associated with coffee plants and berries. Recent Advances in Plantation crops Research, 396–399.
218	Velmourougane, K., Panneerselvam, P., and Gopinandhan, T. N. (2006). Determination of optimal drying floors for quality improvement, molds prevention and Ochratoxin-A contamination in coffee. Journal of Coffee Research 34, 44–56.
219	Vilela, D. M., Pereira, G. V. de M., Silva, C. F., Batista, L. R., and Schwan, R. F. (2010). Molecular ecology and polyphasic characterization of the microbiota associated with semi-dry processed coffee (Coffea arabica L.). Food Microbiology 27, 1128–1135. doi:10.1016/j.fm.2010.07.024.
220	Von Lilienfeld-Toal, O. A. (1931). Fermentação de Cafe: Trabalho organisado no laboratorio de bacteriologia agricola do instituto agronomica do estado. San Paulo, Brazil: Diretoria de Publicidade Agricola.
221	Waller, J. M., and Masaba, D. M. (2006). The microflora of coffee surfaces and relationships to coffee berry disease. International Journal of Pest Management 52, 89–96. doi:10.1080/09670870600568311.
222	Wedhastri, S., Yudianti, N. F., Widada, J., and Baon, J. B. (2012). Ability of Non Symbiotic Nitrogen-Fixing Bacteria Isolated from Coffee Plant Rhizosphere and Their Effects on Robusta Coffee Seedlings. Journal of Agricultural Science and Technology A 2, 660–666.
223	Win, Y. Y., Singh, M., Sadiq, M. B., and Anal, A. K. (2019). Isolation and identification of caffeine-degrading bacteria from coffee plantation area. Food Biotechnology 33, 109–124. doi:10.1080/08905436.2019.1570854.
224	Yamaoka-Yano, D. M., and Mazzafera, P. (1998). Degradation of caffeine by Pseudomonas putida isolated from soil under coffee cultivation. Allelopathy Journal 5, 23–31.
225	Yamaoka-Yano, D. M., and Mazzafera, P. (1999). Catabolism of caffeine and purification of a xanthine oxidase responsible for methyluric acids production in Pseudomonas putida L. Revista de Microbiologia 30, 62–70. doi:10.1590/S0001-37141999000100013.
226	Yu, C. L., Summers, R. M., Li, Y., Mohanty, S. K., Subramanian, M., and Pope, R. M. (2015). Rapid Identification and Quantitative Validation of a Caffeine-Degrading Pathway in Pseudomonas sp. CES. Journal of Proteome Research 14, 95–106. doi:10.1021/pr500751w.
227	Zhang, S. J., De Bruyn, F., Pothakos, V., Contreras, G. F., Cai, Z., Moccand, C., et al. (2019a). Influence of Various Processing Parameters on the Microbial Community Dynamics, Metabolomic Profiles, and Cup Quality During Wet Coffee Processing. Frontiers in Microbiology 10. doi:10.3389/fmicb.2019.02621.
228	Zhang, S. J., De Bruyn, F., Pothakos, V., Torres, J., Falconi, C., Moccand, C., et al. (2019b). Following Coffee Production from Cherries to Cup: Microbiological and Metabolomic Analysis of Wet Processing of Coffea arabica. Applied and Environmental Microbiology 85. doi:10.1128/AEM.02635-18.
229	Perea Rojas, Y. del C., Arias, R. M., Medel Ortiz, R., Trejo Aguilar, D., Heredia, G., and Rodríguez Yon, Y. (2019). Effects of native arbuscular mycorrhizal and phosphate-solubilizing fungi on coffee plants. Agroforestry Systems 93, 961–972. doi:10.1007/s10457-018-0190-1.
230	Ramos, D. M. B., Silva, C. F., Batista, L. R., and Schwan, R. F. (2010). Inibição in vitro de fungos toxigênicos por Pichia sp. e Debaryomyces sp. isoladas de frutos de café (Coffea arabica). Acta Scientiarum. Agronomy 32. doi:10.4025/actasciagron.v32i3.3361.
231	Elhalis, H., Cox, J., and Zhao, J. (2020b). Ecological diversity, evolution and metabolism of microbial communities in the wet fermentation of Australian coffee beans. International Journal of Food Microbiology 321, 108544. doi:10.1016/j.ijfoodmicro.2020.108544.
232	Elhalis, H., Cox, J., Frank, D., and Zhao, J. (2020a). The crucial role of yeasts in the wet fermentation of coffee beans and quality. International Journal of Food Microbiology 333, 108796. doi:10.1016/j.ijfoodmicro.2020.108796.
233	Da Mota, M. C. B., Batista, N. N., Rabelo, M. H. S., Ribeiro, D. E., Borém, F. M., and Schwan, R. F. (2020). Influence of fermentation conditions on the sensorial quality of coffee inoculated with yeast. Food Research International 136, 109482. doi:10.1016/j.foodres.2020.109482.
234	Veloso, T. G. R., da Silva, M. de C. S., Cardoso, W. S., Guarçoni, R. C., Kasuya, M. C. M., and Pereira, L. L. (2020). Effects of environmental factors on microbiota of fruits and soil of Coffea arabica in Brazil. Scientific Reports 10. doi:10.1038/s41598-020-71309-y.
235	Duong, B., Nguyen, H. X., Phan, H. V., Colella, S., Trinh, P. Q., Hoang, G. T., et al. (2021). Identification and characterization of Vietnamese coffee bacterial endophytes displaying in vitro antifungal and nematicidal activities. Microbiological Research 242, 126613. doi:10.1016/j.micres.2020.126613.
