# Supplementary material for: Coffee Microbiota and Its Potential Use in Sustainable Crop Management. A Review
Source: Frontiers journal article supplement (doi:10.3389/fsufs.2020.607935), 2020-12-03
Supplement: Table_5.XLSX [file Table_5.XLSX]

## Sheet: Venn diagram
Venn diagrams and partitions of the archaea and bacteria (blue), and fungi (red) shared between endophytic, epiphytic and rhizospheric compartments of the indigenous coffee microbiota. (A) at the genus level and (B) at the species level.

## Sheet: a
Kingdom	Genera		Kingdom	Genus species
Archaea	Halobacterium		Bacteria	Acinetobacter baumannii
Archaea	Halococcus		Bacteria	Acinetobacter calcoaceticus
Archaea	Haloferax		Bacteria	Acinetobacter johnsonii
Archaea	Methanobrevibacter		Bacteria	Acinetobacter lwoffii
Bacteria	Acidipila		Bacteria	Aeromonas salmonicida
Bacteria	Acidobacterium		Bacteria	Agrobacterium radiobacter
Bacteria	Actinoallomurus		Bacteria	Alcaligenes xylosoxydans
Bacteria	Amycolatopsis		Bacteria	Arthrobacter ilicis
Bacteria	Blastopirellula		Bacteria	Arthrobacter nitrophenolicus
Bacteria	Brachybacterium		Bacteria	Bacillus acidiceler
Bacteria	Brevibacterium		Bacteria	Bacillus aerophilus
Bacteria	Caballeronia		Bacteria	Bacillus depressus
Bacteria	Cellulomonas		Bacteria	Bacillus indicus
Bacteria	Clavibacter		Bacteria	Bacillus lentimorbus
Bacteria	Corynebacterium		Bacteria	Bacillus megaterium
Bacteria	Cytophaga		Bacteria	Bacillus mojavensis
Bacteria	Escherichia		Bacteria	Bacillus pacificus
Bacteria	Frankia		Bacteria	Bacillus simplex
Bacteria	Gemmata		Bacteria	Bacillus terrae
Bacteria	Granulicella		Bacteria	Bacillus timonensis
Bacteria	Herbaspirillum		Bacteria	Bacillus tropicus
Bacteria	Humibacter		Bacteria	Bacillus velezensis
Bacteria	Hydrogenophaga		Bacteria	Bacillus wuyishanensis
Bacteria	Janibacter		Bacteria	Brachybacterium rhamnosum
Bacteria	Kitasatospora		Bacteria	Bradyrhizobium japonicum
Bacteria	Klebsiella		Bacteria	Brevibacillus choshinensis
Bacteria	Kluyvera		Bacteria	Brevibacterium helvolum
Bacteria	Ktedonobacter		Bacteria	Burkholderia ambifaria
Bacteria	Kutzneria		Bacteria	Burkholderia cepacia
Bacteria	Lactobacillus		Bacteria	Burkholderia glathei
Bacteria	Lechevalieria		Bacteria	Burkholderia pyrrocinia
Bacteria	Luteibacter		Bacteria	Burkholderia seminalis
Bacteria	Methylobacterium		Bacteria	Burkholderia unamae
Bacteria	Microbacterium		Bacteria	Caballeronia glebae
Bacteria	Mycolicibacterium		Bacteria	Cellulomonas fimi
Bacteria	Nakamurella		Bacteria	Cellulomonas gelida
Bacteria	Nitrosovibrio		Bacteria	Cellulomonas hominis
Bacteria	Nocardia		Bacteria	Chryseobacterium balustinum
Bacteria	Ornithinibacillus		Bacteria	Chryseobacterium indologenes
Bacteria	Pandoraea		Bacteria	Clavibacter michiganensis
Bacteria	Paraburkholderia		Bacteria	Comamonas acidovorans
Bacteria	Paracoccus		Bacteria	Corynebacterium freneyi
Bacteria	Pectobacterium		Bacteria	Curtobacterium herbarum
Bacteria	Ralstonia		Bacteria	Curtobacterium oceanosedimentum
Bacteria	Rhizobium		Bacteria	Cytophaga johnsonae
Bacteria	Saccharibacter		Bacteria	Enterobacter asburiae
Bacteria	Salmonella		Bacteria	Enterobacter cloacae
Bacteria	Shigella		Bacteria	Enterobacter gergoviae
Bacteria	Sinomonas		Bacteria	Enterobacter hormaechei
Bacteria	Solirubrobacter		Bacteria	Escherichia coli
Bacteria	Staphylococcus		Bacteria	Escherichia fergusonii
Bacteria	Thermosporothrix		Bacteria	Escherichia vulneris
Bacteria	Virgibacillus		Bacteria	Herbaspirillum frisingense
Fungi	Acaulospora		Bacteria	Hydrogenophaga pseudoflava
Fungi	Acrocalymma		Bacteria	Janibacter melonis
Fungi	Acrodontium		Bacteria	Kitasatospora arboriphila
Fungi	Ambispora		Bacteria	Kitasatospora phosalacinea
Fungi	Archaeospora		Bacteria	Klebsiella oxytoca
Fungi	Ascochyta		Bacteria	Klebsiella planticola
Fungi	Aureobasidium		Bacteria	Klebsiella pneumoniae
Fungi	Bionectria		Bacteria	Klebsiella trevisanii
Fungi	Biscogniauxia		Bacteria	Kluyvera ascorbata
Fungi	Brunneochlamydosporium		Bacteria	Kocuria halotolerans
Fungi	Camarosporium		Bacteria	Kocuria palustris
Fungi	Cercospora		Bacteria	Kocuria turfanensis
Fungi	Cetraspora		Bacteria	Lactobacillus paracasei
Fungi	Chordomyces		Bacteria	Lechevalieria aerocolonigenes
Fungi	Claroideoglomus		Bacteria	Leifsonia shinshuensis
Fungi	Clitocybe		Bacteria	Luteibacter yeojuensis
Fungi	Clonostachys		Bacteria	Lysinibacillus xylanilyticus
Fungi	Codinaeopsis		Bacteria	Methylobacterium radiotolerans
Fungi	Coniosporium		Bacteria	Methylobacterium tardum
Fungi	Conoplea		Bacteria	Microbacterium testaceum
Fungi	Crassiparies		Bacteria	Micrococcus halobius
Fungi	Cryptococcus		Bacteria	Micrococcus kristinae
Fungi	Cryptosporiopsis		Bacteria	Micrococcus luteus
Fungi	Daldinia		Bacteria	Micrococcus varians
Fungi	Dentiscutata		Bacteria	Mycobacterium confluentis
Fungi	Diaporthe		Bacteria	Mycobacterium grossiae
Fungi	Diplodia		Bacteria	Mycobacterium septicum
Fungi	Diversispora		Bacteria	Mycolicibacterium peregrinum
Fungi	Dokmaia		Bacteria	Nocardia cerradoensis
Fungi	Dominikia		Bacteria	Nocardia jiangxiensis
Fungi	Emericella		Bacteria	Nocardia niigatensis
Fungi	Engyodontium		Bacteria	Nocardia nova
Fungi	Entrophospora		Bacteria	Nocardia tengchongensis
Fungi	Exidiopsis		Bacteria	Paenibacillus amylolyticus
Fungi	Exophiala		Bacteria	Paenibacillus illinoisensis
Fungi	Funneliformis		Bacteria	Paenibacillus pabuli
Fungi	Fuscoporia		Bacteria	Paenibacillus polymyxa
Fungi	Gigaspora		Bacteria	Pandoraea pnomenusa
Fungi	Glomerella		Bacteria	Pantoea eucrina
Fungi	Glomus		Bacteria	Paraburkholderia oxyphila
Fungi	Gongronella		Bacteria	Paraburkholderia sabiae
Fungi	Hansfordia		Bacteria	Paracoccus sanguinis
Fungi	Hypoxylon		Bacteria	Pectobacterium carotovorum
Fungi	Idriella		Bacteria	Pseudomonas coronafaciens
Fungi	Irpex		Bacteria	Pseudomonas corrugata
Fungi	Isaria		Bacteria	Pseudomonas nitroreducens
Fungi	Jaminaea		Bacteria	Pseudomonas syringae
Fungi	Khuskia		Bacteria	Pseudomonas tolaasii
Fungi	Knufia		Bacteria	Rhizobium mongolense
Fungi	Lacazia		Bacteria	Rhizobium radiobacter
Fungi	Lasiodiplodia		Bacteria	Rhodococcus equi
Fungi	Leptosillia		Bacteria	Salmonella enterica
Fungi	Leptosphaeria		Bacteria	Salmonella typhimurium
Fungi	Leptosphaerulina		Bacteria	Shigella sonnei
Fungi	Libertella		Bacteria	Sinomonas albida
Fungi	Lopadostoma		Bacteria	Sinomonas atrocyanea
Fungi	Lunulospora		Bacteria	Sphingobium japonicum
Fungi	Macrophomina		Bacteria	Staphylococcus epidermidis
Fungi	Marasmius		Bacteria	Streptomyces mobaraensis
Fungi	Meira		Bacteria	Variovorax paradoxus
Fungi	Microascus		Fungi	Acaulospora alpina
Fungi	Microdiplodia		Fungi	Acaulospora bireticulata
Fungi	Microsphaeropsis		Fungi	Acaulospora capsicula
Fungi	Muscodor		Fungi	Acaulospora cavernata
Fungi	Musidium		Fungi	Acaulospora colombiana
Fungi	Mycena		Fungi	Acaulospora delicata
Fungi	Mycocentrospora		Fungi	Acaulospora denticulata
Fungi	Mycosphaerella		Fungi	Acaulospora dilatata
Fungi	Myrothecium		Fungi	Acaulospora elegans
Fungi	Nemania		Fungi	Acaulospora excavata
Fungi	Neodidymella		Fungi	Acaulospora foveata
Fungi	Neopyrenochaeta		Fungi	Acaulospora kentinensis
Fungi	Neosartorya		Fungi	Acaulospora lacunosa
Fungi	Neosetophoma		Fungi	Acaulospora laevis
Fungi	Nigrograna		Fungi	Acaulospora longula
Fungi	Nodulisporium		Fungi	Acaulospora mellea
Fungi	Oehlia		Fungi	Acaulospora morrowiae
Fungi	Ophiognomonia		Fungi	Acaulospora paulinae
Fungi	Otospora		Fungi	Acaulospora rehmii
Fungi	Pacispora		Fungi	Acaulospora scrobiculata
Fungi	Paraconiothyrium		Fungi	Acaulospora spinosa
Fungi	Paraglomus		Fungi	Acaulospora splendida
Fungi	Paramicrosporidium		Fungi	Acaulospora tuberculata
Fungi	Paraphaeosphaeria		Fungi	Acremonium alternatum
Fungi	Parascedosporium		Fungi	Alternaria citri
Fungi	Peniophora		Fungi	Ambispora appendicula
Fungi	Periconia		Fungi	Ambispora fennica
Fungi	Pestalotiopsis		Fungi	Ambispora gerdemannii
Fungi	Petriella		Fungi	Ambispora leptoticha
Fungi	Phaeosphaeria		Fungi	Ambispora nicolsonii
Fungi	Phialemoniopsis		Fungi	Ambispora reticulata
Fungi	Phlebiopsis		Fungi	Archaeospora myriocarpa
Fungi	Phyllosticta		Fungi	Archaeospora schenckii
Fungi	Plectosphaerella		Fungi	Archaeospora trappei
Fungi	Pseudallescheria		Fungi	Aspergillus fumigatus
Fungi	Pseudobeltrania		Fungi	Aspergillus oryzae
Fungi	Pseudohalonectria		Fungi	Aspergillus phoenicis
Fungi	Pseudozyma		Fungi	Aspergillus pseudodeflectus
Fungi	Racocetra		Fungi	Aspergillus sclerotiorum
Fungi	Redeckera		Fungi	Aspergillus tamarii
Fungi	Rhizoglomus		Fungi	Aspergillus versicolor
Fungi	Rhizophagus		Fungi	Aspergillus westerdijkiae
Fungi	Rhizopycnis		Fungi	Aureobasidium pullulans
Fungi	Rosellinia		Fungi	Beauveria brongniartii
Fungi	Roussoella		Fungi	Cetraspora armeniaca
Fungi	Sarocladium		Fungi	Cetraspora gilmorei
Fungi	Schizophyllum		Fungi	Cetraspora nodosa
Fungi	Sclerocystis		Fungi	Cetraspora pellucida
Fungi	Scutellospora		Fungi	Cladosporium cladosporioides
Fungi	Septoglomus		Fungi	Cladosporium gossypiicola
Fungi	Sieverdingia		Fungi	Cladosporium laxicapitulatum
Fungi	Sistotremastrum		Fungi	Cladosporium sphaerospermum
Fungi	Sporobolomyces		Fungi	Cladosporium tenuissimum
Fungi	Stagonospora		Fungi	Claroideoglomus claroideum
Fungi	Stagonosporopsis		Fungi	Claroideoglomus etunicatum
Fungi	Staninwardia		Fungi	Claroideoglomus lamellosum
Fungi	Stereum		Fungi	Claroideoglomus luteum
Fungi	Talaromyces		Fungi	Claroideoglomus walkeri
Fungi	Tilletia		Fungi	Clonostachys agrawalii
Fungi	Tilletiopsis		Fungi	Clonostachys rosea
Fungi	Trametes		Fungi	Colletotrichum brassicicola
Fungi	Trechispora		Fungi	Colletotrichum coffeanum
Fungi	Triscelophorus		Fungi	Colletotrichum crassipes
Fungi	Xenomyrothecium		Fungi	Colletotrichum musae
			Fungi	Crassiparies quadrisporus
			Fungi	Cryptosporiopsis corticola
			Fungi	Dentiscutata cerradensis
			Fungi	Dentiscutata erythropus
			Fungi	Dentiscutata heterogama
			Fungi	Dentiscutata savannicola
			Fungi	Diaporthe liquidambaris
			Fungi	Diaporthe phaseoli
			Fungi	Diversispora aurantia
			Fungi	Diversispora pustulata
			Fungi	Diversispora trimurales
			Fungi	Dominikia aurea
			Fungi	Drechslera biseptata
			Fungi	Emericella nidulans
			Fungi	Entrophospora infrequens
			Fungi	Epicoccum nigrun
			Fungi	Funneliformis caledonius
			Fungi	Funneliformis coronatus
			Fungi	Funneliformis dimorphicus
			Fungi	Funneliformis geosporus
			Fungi	Funneliformis halonatus
			Fungi	Funneliformis kerguelensis
			Fungi	Funneliformis monosporus
			Fungi	Funneliformis mosseae
			Fungi	Fusarium equiseti
			Fungi	Fusarium oxysporum
			Fungi	Fusarium solani
			Fungi	Gigaspora albida
			Fungi	Gigaspora decipiens
			Fungi	Gigaspora gigantea
			Fungi	Gigaspora margarita
			Fungi	Gigaspora rosea
			Fungi	Glomerella acutata
			Fungi	Glomerella cingulata
			Fungi	Glomus ambisporum
			Fungi	Glomus australe
			Fungi	Glomus boreale
			Fungi	Glomus brohultii
			Fungi	Glomus citricola
			Fungi	Glomus delhiens
			Fungi	Glomus flavisporum
			Fungi	Glomus fuegianum
			Fungi	Glomus globiferum
			Fungi	Glomus glomerulatum
			Fungi	Glomus heterosporum
			Fungi	Glomus hoi
			Fungi	Glomus macrocarpum
			Fungi	Glomus magnicaule
			Fungi	Glomus microcarpum
			Fungi	Glomus multicaule
			Fungi	Glomus multisubstensum
			Fungi	Glomus pallidum
			Fungi	Glomus pansihalos
			Fungi	Glomus radiatum
			Fungi	Glomus reticulatum
			Fungi	Glomus segmentatum
			Fungi	Glomus spinuliferum
			Fungi	Glomus tenebrosum
			Fungi	Glomus trufemii
			Fungi	Glomus versiforme
			Fungi	Guignardia mangiferae
			Fungi	Khuskia oryzae
			Fungi	Lacazia loboi
			Fungi	Lasiodiplodia pseudotheobromae
			Fungi	Lecanicillium coprophilum
			Fungi	Lunulospora curvula
			Fungi	Muscodor equiseti
			Fungi	Myrothecium roridum
			Fungi	Nodulisporium gregarium
			Fungi	Oehlia diaphana
			Fungi	Otospora bareae
			Fungi	Pacispora scintillans
			Fungi	Paecilomyces fumosoroseus
			Fungi	Paecilomyces javanicus
			Fungi	Paraglomus albidum
			Fungi	Paraglomus brasilianum
			Fungi	Paraglomus laccatum
			Fungi	Paraglomus lacteum
			Fungi	Paraglomus occultum
			Fungi	Penicillium biverticillate
			Fungi	Penicillium brocae
			Fungi	Penicillium cecidicola
			Fungi	Penicillium citrinum
			Fungi	Penicillium coffeae
			Fungi	Penicillium crustosum
			Fungi	Penicillium diversum
			Fungi	Penicillium glabrum
			Fungi	Penicillium olsonii
			Fungi	Penicillium oxalicum
			Fungi	Penicillium roseopurpureum
			Fungi	Penicillium sclerotiorum
			Fungi	Penicillium steckii
			Fungi	Penicillium sumatraense
			Fungi	Penicillium toxicarium
			Fungi	Pestalotiopsis maculans
			Fungi	Phoma eupyrena
			Fungi	Phoma exigua
			Fungi	Phoma herbarum
			Fungi	Phomopsis arnoldiae
			Fungi	Phomopsis stipata
			Fungi	Phyllosticta capitalensis
			Fungi	Pseudallescheria boydii
			Fungi	Pseudohalonectria lutea
			Fungi	Racocetra alborosea
			Fungi	Racocetra persica
			Fungi	Racocetra verrucosa
			Fungi	Redeckera fulvum
			Fungi	Rhizoglomus microaggregatum
			Fungi	Rhizophagus aggregatus
			Fungi	Rhizophagus clarus
			Fungi	Rhizophagus fasciculatus
			Fungi	Rhizophagus intraradices
			Fungi	Rhizophagus invermaius
			Fungi	Rhizophagus irregularis
			Fungi	Rhizophagus manihotis
			Fungi	Rhizophagus prolifer
			Fungi	Rhizophagus vesiculiferus
			Fungi	Rhodotorula aurantiaca
			Fungi	Sarocladium bacillisporum
			Fungi	Sclerocystis clavispora
			Fungi	Sclerocystis coremioides
			Fungi	Sclerocystis liquidambaris
			Fungi	Sclerocystis rubiformis
			Fungi	Sclerocystis sinuosa
			Fungi	Sclerocystis taiwanensis
			Fungi	Scutellospora arenicola
			Fungi	Scutellospora biornata
			Fungi	Scutellospora calospora
			Fungi	Scutellospora dipapillosa
			Fungi	Scutellospora projectura
			Fungi	Septoglomus constrictum
			Fungi	Septoglomus deserticola
			Fungi	Septoglomus xanthium
			Fungi	Sieverdingia tortuosa
			Fungi	Sistotremastrum guttuliferum
			Fungi	Talaromyces trachyspermus
			Fungi	Trichoderma aureoviride
			Fungi	Trichoderma flagellatum
			Fungi	Trichoderma lixii
			Fungi	Trichoderma pseudoharzianum
			Fungi	Triscelophorus acuminatus
			Fungi	Triscelophorus konajensis
			Fungi	Triscelophorus monosporus

## Sheet: b
Kingdom	Genera		Kingdom	Genus species
Bacteria	Proteus		Bacteria	Burkholderia vietnamiensis
Bacteria	Streptococcus		Bacteria	Citrobacter gillenii
Bacteria	Xanthomonas		Bacteria	Enterobacter aerogenes
Bacteria	Yersinia		Bacteria	Enterobacter cancerogenus
Fungi	Calcarisporium		Bacteria	Yersinia frederiksenii
Fungi	Exserohilum		Fungi	Aspergillus flavus
Fungi	Rhizopus		Fungi	Aspergillus ochraceus
Fungi	Schizosaccharomyces		Fungi	Calcarisporium arbuscula
Fungi	Simplicillium		Fungi	Calcarisporium ovalisporum
Fungi	Sporothrix		Fungi	Candida guilliermondii
Fungi	Torula		Fungi	Candida parapsilosis
Fungi	Torulopsis		Fungi	Candida pelliculosa
			Fungi	Candida tropicalis
			Fungi	Cladosporium herbarum
			Fungi	Colletotrichum acutatum
			Fungi	Colletotrichum kahawae
			Fungi	Fusarium pallidoroserum
			Fungi	Rhodotorula mucilaginosa
			Fungi	Saccharomyces bayanus
			Fungi	Saccharomyces cerevisiae
			Fungi	Saccharomyces marxianus
			Fungi	Simplicillium lanosoniveum
			Fungi	Sporothrix guttuliformis
			Fungi	Torulopsis famata
			Fungi	Verticillium lecanii

## Sheet: c
Kingdom	Genera		Kingdom	Genus species
Archaea	Nitrososphaera		Bacteria	Azotobacter chroococcum
Bacteria	Acetobacter		Bacteria	Bacillus anthracis
Bacteria	Achromobacter		Bacteria	Bacillus circulans
Bacteria	Acidothermus		Bacteria	Bacillus coagulans
Bacteria	Acidovorax		Bacteria	Bacillus lactolactis
Bacteria	Aeromicrobium		Bacteria	Bacillus mobilis
Bacteria	Afipia		Bacteria	Bacillus spaericus
Bacteria	Agromyces		Bacteria	Bacillus stearothermophilus
Bacteria	Alicyclobacillus		Bacteria	Bacillus tequilensis
Bacteria	Ammoniphilus		Bacteria	Burkholderia contaminans
Bacteria	Azotobacter		Bacteria	Enterobacter intermedius
Bacteria	Beijerinckia		Bacteria	Erwinia rhapontici
Bacteria	Bryobacter		Bacteria	Gordonia amicalis
Bacteria	Candidatus Solibacter		Bacteria	Leifsonia aquatica
Bacteria	Candidatus Udaeobacter		Bacteria	Ochrobactrum pseudogrignonense
Bacteria	Candidatus Xiphinematobacter		Bacteria	Pasteuria penetrans
Bacteria	Caulobacter		Bacteria	Pseudomonas cichorii
Bacteria	Cellvibrio		Bacteria	Pseudomonas koreensis
Bacteria	Chryseomonas		Bacteria	Pseudomonas plecoglossicida
Bacteria	Devosia		Bacteria	Pseudomonas protegens
Bacteria	Filimonas		Bacteria	Pseudomonas stutzeri
Bacteria	Kaistia		Bacteria	Pseudomonas taiwanensis
Bacteria	Kaistobacter		Bacteria	Pseudomonas umsongensis
Bacteria	Luteolibacter		Bacteria	Rhodococcus rhodnii
Bacteria	Mesorhizobium		Bacteria	Serratia marcescens
Bacteria	Methylotenera		Bacteria	Serratia nematodiphila
Bacteria	Nitrospira		Fungi	Cylindrocarpon didymum
Bacteria	Pasteurella		Fungi	Cylindrocarpon obtusisporum
Bacteria	Pasteuria		Fungi	Paecilomyces marquandii
Bacteria	Pedobacter		Fungi	Trichoderma afroharzianum
Bacteria	Pedomicrobium		Fungi	Trichoderma asperelloides
Bacteria	Phenylobacterium		Fungi	Trichoderma atroviride
Bacteria	Phycicoccus		Fungi	Trichoderma gamsii
Bacteria	Planctomyces		Fungi	Trichoderma koningiopsis
Bacteria	Pseudolabrys		Fungi	Trichoderma longibrachiatum
Bacteria	Rheinheimera		Fungi	Trichoderma spirale
Bacteria	Rhodoferax		Fungi	Trichoderma viride
Bacteria	Rhodoplanes
Bacteria	Salinibacterium
Bacteria	Salinispora
Bacteria	Shinella
Bacteria	Solibacter
Bacteria	Sphingobacterium
Bacteria	Terribacillus
Bacteria	Vibrio
Fungi	Aschersonia
Fungi	Cladophialophora
Fungi	Humicola

## Sheet: d
Kingdom	Genera		Kingdom	Genus species
Bacteria	Acinetobacter		Bacteria	Bacillus amyloliquefaciens
Bacteria	Aeromonas		Bacteria	Bacillus brevis
Bacteria	Agrobacterium		Bacteria	Bacillus cereus
Bacteria	Alcaligenes		Bacteria	Bacillus firmus
Bacteria	Arthrobacter		Bacteria	Bacillus licheniformis
Bacteria	Azospirillum		Bacteria	Bacillus mycoides
Bacteria	Bradyrhizobium		Bacteria	Bacillus pumilus
Bacteria	Brevibacillus		Bacteria	Gluconacetobacter diazotrophicus
Bacteria	Chromobacterium		Bacteria	Pseudomonas aeruginosa
Bacteria	Chryseobacterium		Bacteria	Pseudomonas chlororaphis
Bacteria	Comamonas		Bacteria	Pseudomonas fluorescens
Bacteria	Edaphobacter		Fungi	Penicillium brevicompactum
Bacteria	Erwinia		Fungi	Penicillium janthinellum
Bacteria	Gordonia		Fungi	Trichoderma hamatum
Bacteria	Janthinobacterium		Fungi	Trichoderma harzianum
Bacteria	Leifsonia
Bacteria	Lysinibacillus
Bacteria	Micrococcus
Bacteria	Mycobacterium
Bacteria	Ochrobactrum
Bacteria	Paenibacillus
Bacteria	Rhodococcus
Bacteria	Sphingobium
Bacteria	Sphingomonas
Bacteria	Steroidobacter
Bacteria	Variovorax
Fungi	Acremonium
Fungi	Chaetomium
Fungi	Paecilomyces

## Sheet: e
Kingdom	Genera		Kingdom	Genus species
Bacteria	Cedecea		Bacteria	Bacillus thuringiensis
Bacteria	Curtobacterium		Bacteria	Burkholderia gladioli
Bacteria	Pantoea		Bacteria	Cedecea davisae
Fungi	Alternaria		Bacteria	Curtobacterium flaccumfaciens
Fungi	Beauveria		Bacteria	Kocuria kristinae
Fungi	Bipolaris		Bacteria	Pantoea agglomerans
Fungi	Botryosphaeria		Bacteria	Serratia liquefaciens
Fungi	Colletotrichum		Fungi	Alternaria alternata
Fungi	Drechslera		Fungi	Beauveria bassiana
Fungi	Epicoccum		Fungi	Colletotrichum gloeosporioides
Fungi	Guignardia		Fungi	Guignardia endophyllicola
Fungi	Lecanicillium
Fungi	Nigrospora
Fungi	Pestalotia
Fungi	Phoma
Fungi	Phomopsis
Fungi	Rhodotorula
Fungi	Verticillium
Fungi	Xylaria

## Sheet: f
Kingdom	Genera		Kingdom	Genus species
Bacteria	Flavobacterium		Bacteria	Gluconacetobacter azotocaptans
Fungi	Candida		Bacteria	Gluconacetobacter johannae
Fungi	Mucor
Fungi	Rhizoctonia
Fungi	Saccharomyces

## Sheet: g
Kingdom	Genera		Kingdom	Genus species
Bacteria	Bacillus		Bacteria	Bacillus subtilis
Bacteria	Burkholderia		Bacteria	Pseudomonas putida
Bacteria	Citrobacter		Bacteria	Stenotrophomonas maltophilia
Bacteria	Enterobacter		Fungi	Aspergillus niger
Bacteria	Gluconacetobacter
Bacteria	Kocuria
Bacteria	Pseudomonas
Bacteria	Serratia
Bacteria	Stenotrophomonas
Bacteria	Streptomyces
Fungi	Aspergillus
Fungi	Cladosporium
Fungi	Cylindrocarpon
Fungi	Fusarium
Fungi	Penicillium
Fungi	Trichoderma
